1 **Single-Cell RNA-seq of Heart Reveals Intercellular Communication Drivers of**  
2 **Myocardial Fibrosis in Diabetic Mice**

3 Wei Li<sup>1</sup>, Xinqi Lou<sup>2</sup>, Yingjie Zha<sup>2</sup>, Jun Zha<sup>3</sup>, Lei Hong<sup>2</sup>, Zhanli Xie<sup>2</sup>, Shudi Yang<sup>4</sup>,  
4 Chen Wang<sup>3</sup>, Jianzhong An<sup>2</sup>, Zhenhao Zhang<sup>2</sup>, Shigang Qiao<sup>2,3</sup>

5 <sup>1</sup> Cyrus Tang Hematology Center, Soochow University, Suzhou, China

6 <sup>2</sup> Institute of Clinical Medicine Research, Suzhou Science & Technology Town  
7 Hospital, Gusu School, Nanjing Medical University, Suzhou, China

8 <sup>3</sup> Faculty of Anesthesiology, Suzhou Science & Technology Town Hospital, Gusu  
9 School, Nanjing Medical University, Suzhou, China

10 <sup>4</sup> Suzhou Polytechnic Institute of Agriculture, Suzhou, China

11

12 Correspondence to: Zhenhao Zhang, Tel: (+86)19951296337. E-mail

13 zhangzhh1@njmu.edu.cn; Or Shigang Qiao, Tel: (+86)17715187396. E-mail

14 qiaos@njmu.edu.cn. Institute of Clinical Medicine Research, Suzhou Science &

15 Technology Town Hospital, Gusu School, Nanjing Medical University, 1 Li Jiang

16 Road, Suzhou, 215153, China.

17

18

19 **Abstract:** Diabetes-induced cardiomyopathy is characterized by myocardial fibrosis  
20 as a main pathology. In-depth study of cardiac heterogeneity and cell-to-cell  
21 interactions will help to reveal the pathogenesis of diabetic myocardial fibrosis and  
22 provide potential targets for the treatment of this disease. Here, we insighted into the  
23 intercellular communication drivers underlying myocardial fibrosis in mouse heart  
24 with high-fat-diet (HFD)/streptozotocin (STZ)-induced diabetes at single-cell  
25 resolution. Intercellular and protein-protein interaction networks of fibroblasts and  
26 macrophages, endothelial cells, as well as fibroblasts and epicardial cells reveal  
27 critical changes in ligand-receptor interactions such as Pdgf(s)-Pdgfra and  
28 Efemp1-Egfr, which promote the development of a profibrotic microenvironment  
29 during diabetes progression and confirm that specific inhibition of Pdgfra axis can  
30 significantly improve diabetic myocardial fibrosis. We further identified the  
31 phenotypically distinct Hrc<sup>hi</sup> and Postn<sup>hi</sup> fibroblast subpopulations that are associated  
32 with pathological extracellular matrix remodeling, of which Hrc<sup>hi</sup> fibroblasts are the  
33 most profibrogenic under diabetic conditions. Finally, we validated the role of Itgb1  
34 hub gene mediated intercellular communication drivers of diabetic myocardial  
35 fibrosis in Hrc<sup>hi</sup> fibroblasts, and confirmed the result by AAV9-mediated Itgb1  
36 knockdown in the heart of diabetic mice. In summary, cardiac cell mapping provides  
37 novel insights into intercellular communication drivers underlying pathological  
38 extracellular matrix remodeling during diabetic myocardial fibrosis.

39

40 **Keywords:** Single-cell RNA-seq, Myocardial Fibrosis, Fibroblast, Type 2 diabetes.

41

## 42 **Introduction**

43 Diabetes is the third cause of threatening human health, approximately 537 million  
44 adults are living with diabetes, of which type 2 diabetes patients account for more  
45 than 90%. Cardiac complications are the most common causes of death and disability  
46 associated with diabetes. As the key initiating factor of diabetic cardiomyopathy,  
47 hyperglycemia can prevent optimal utilization of glucose by the cardiomyocytes and

48 leads to myocardial fibrosis. Myocardial fibrosis is characterized by the increase in  
49 extracellular matrix proteins, deposition of interstitial collagen, disarrangement of  
50 cardiomyocytes and the remodeling of cardiac structure (*Russo and Frangogiannis,*  
51 *2016; Jia et al., 2018*). Since adult mammalian cardiomyocytes are virtually incapable  
52 of regeneration, the most extensive extracellular matrix remodeling and fibrosis of the  
53 heart occurs in diseases caused by acute cardiomyocyte death (*Kong et al., 2014*).  
54 Understanding the mechanisms responsible for myocardial fibrosis is critical to  
55 develop anti-fibrotic therapy strategies for diabetic patients.

56 Mammalian hearts consist of many cell types, including cardiomyocytes,  
57 macrophages, fibroblasts and endothelial cells, etc. (*Banerjee et al., 2007;*  
58 *Litviňuková et al., 2020*). Cell-to-cell communication is a fundamental feature of adult  
59 complex organs. These different types of cells communicate through interactions of  
60 ligand-receptor, where a ligand may be secreted and bind to a receptor, or through the  
61 fusion of two adjacent interacting cell membranes (*Ramilowski et al., 2015*). The  
62 maintenance of heart homeostasis depends on the intercellular communication  
63 (*Ramilowski et al., 2015*). Many ligand-receptor signaling patterns have been found  
64 between the cardiac cells, suggesting the critical role of intercellular communication  
65 in many pathophysiological processes. Therefore, intercellular communication has  
66 become a powerful therapeutic target for preventing or reversing some of the  
67 damaging consequences of diabetic myocardial fibrosis by maintaining fine-tuned  
68 intercellular communication among different cardiac cells. Despite these, the effect of  
69 diabetes on cardiac intercellular communication and myocardial fibrosis remains  
70 poorly understood.

71 Single-cell RNA sequencing (scRNA-seq) is a feasible strategy to study the cellular  
72 heterogeneity of any organ since it allows transcriptomic profiling of individual cells  
73 (*Butler et al., 2018; Gladka et al., 2018; Litviňuková et al., 2020; McLellan et al.,*  
74 *2020*). Recent scRNA-seq of many tissues has revealed cellular heterogeneity and  
75 novel intercellular crosstalk among different cell types. In this study, we developed a  
76 diabetic mouse model through a HFD combined with STZ administration, and  
77 analyzed cell populations in mouse heart by scRNA-seq on a 10x genomics platform.

78 We profiled 32,585 single cardiac cell transcriptomes across 6 healthy controls and 6  
79 diabetic mice, and identified the transcriptional alterations of all cardiac cells,  
80 enrichment of signaling pathways involved in myocardial fibrosis, altered  
81 ligand-receptor interactions described as Pdgf(s)-Pdgfra and Efemp1-Egfr between  
82 fibroblasts and other cardiac cells, and cellular subpopulations associated with  
83 diabetic myocardial fibrosis. Furthermore, a specific Hrc<sup>hi</sup> fibroblast subcluster as well  
84 as intercellular communication drivers of Itgb1 hub gene mediated myocardial  
85 fibrosis were identified. These results suggest that cardiac intercellular  
86 communication plays a critical role in diabetic myocardial fibrosis and specific  
87 targeting of Hrc<sup>hi</sup> fibroblasts may be a potential therapeutic target for diabetic  
88 myocardial fibrosis.

89

## 90 **Results**

### 91 **Single-cell profile of heart in diabetic mice**

92 Conventional single-cell RNA-seq cannot encompass all the cells in the rodent  
93 myocardium for subsequent deep sequencing (*Skelly et al., 2018; Forte et al., 2020*).  
94 Therefore, we isolated the nuclear fractions of all cardiac cells to assess the  
95 heterogeneity of cell populations and the changes of transcriptional profile in response  
96 to pathology of HFD/STZ-induced diabetes (Figure 1-Figure supplement 1A)  
97 (*Grindberg et al., 2013; Lake et al., 2019*). We classified 32585 cardiac cells from 6  
98 healthy controls (16490 cells) and 6 HFD/STZ-induced diabetic mice (16095 cells)  
99 into 25 transcriptionally distinct pre-clusters exhibiting highly consistent expression  
100 patterns across individual mice (Figure 1-Figure supplement 1B and Supplementary  
101 file 1), and identified 14 populations (Figure 1A) based on cell-specific markers and  
102 the significantly enriched genes. The cell populations included fibroblasts (Pdgfra,  
103 Pcdh9, Bmper), endothelial cells (Pecam1, Ccdc85a, Btnl9), macrophages (Fcgr1,  
104 F13a1, Adgre1), pericytes (Pdgfrb, Vtn, Trpc3), adipocytes (Adipoq, Plin1, Tshr),  
105 cardiomyocytes (Ttn, Mhrt, Myh6), smooth muscle cells (Acta2, Myh11, Cdh6),  
106 endocardial cells (Npr3, Tmem108, Plvap), epicardial cells (Msln, Pcdh15, Muc16),  
107 schwan cells (Plp1, Gfra3), and other immune cell populations (T cells, Monocytes, B

108 cells) (Figure 1B). Based on the cell types, markers, and relative proportions, we can  
109 conclude that our data are robust and consistent with previous 10× single nucleus  
110 data from mice heart. (*McLellan et al., 2020*). Further examination of the established  
111 marker genes in each cardiac cell population revealed the presence of a wide range of  
112 cell types in all hearts (Figure 1C and D).

113 HFD/STZ-treatment induced significant transcriptomic changes in most cardiac  
114 populations, especially in fibroblasts, endothelial cells, endocardial cells,  
115 cardiomyocytes and macrophages (Figure 1E, Supplementary file 2, 2-sided Wilcoxon  
116 rank-sum test,  $FDR \leq 0.05$ ,  $\log_2FC \geq 0.36$ ). Analyzing the top 10 upregulated genes  
117 during pathology of HFD/STZ-induced diabetes within each cell population, we  
118 found that some of the top 10 upregulated genes show a noticeable increase in  
119 expression across many different cell types, even though some are primarily  
120 expressed in only one cell type (Figure 1-Figure supplement 2 and Supplementary file  
121 3). Among the top genes upregulated in response to HFD/STZ-induced diabetes  
122 within each cell population were transcripts for PDK4, Angptl4, Txnip, Postn,  
123 Hmgcs2, and Ucp3, several of which have been previously involved in heart failure.  
124 (*Yoshioka et al., 2007; Lang et al., 2018; Sheeran et al., 2019*) KEGG (Kyoto  
125 Encyclopedia of Genes and Genomes) analysis of the upregulated genes revealed  
126 significant enrichment of pathways related to cardiovascular diseases and circulatory  
127 system in most cardiac cell types (Figure 1F, 2-sided Wilcoxon rank-sum test,  $FDR \leq$   
128 0.05), and the top 30 KEGG pathways within some cardiac cell populations were  
129 relevant to dilated cardiomyopathy, cardiac muscle contraction, and hypertrophic  
130 cardiomyopathy, (Figure 1-Figure supplement 3, Figure 1-Figure supplement 4A-D,  
131 2-sided Wilcoxon rank-sum test,  $FDR \leq 0.05$ ). These results indicated a significantly  
132 increased risk of cardiovascular diseases in the diabetic setting.

133 Taken together, scRNA-seq identified distinct cell populations of mouse heart that can  
134 help characterize HFD/STZ-induced diabetes-related changes in gene expression and  
135 quantify gene-trait associations.

136

137 **Figure 1.** Single-cell profile of heart in diabetic mice.

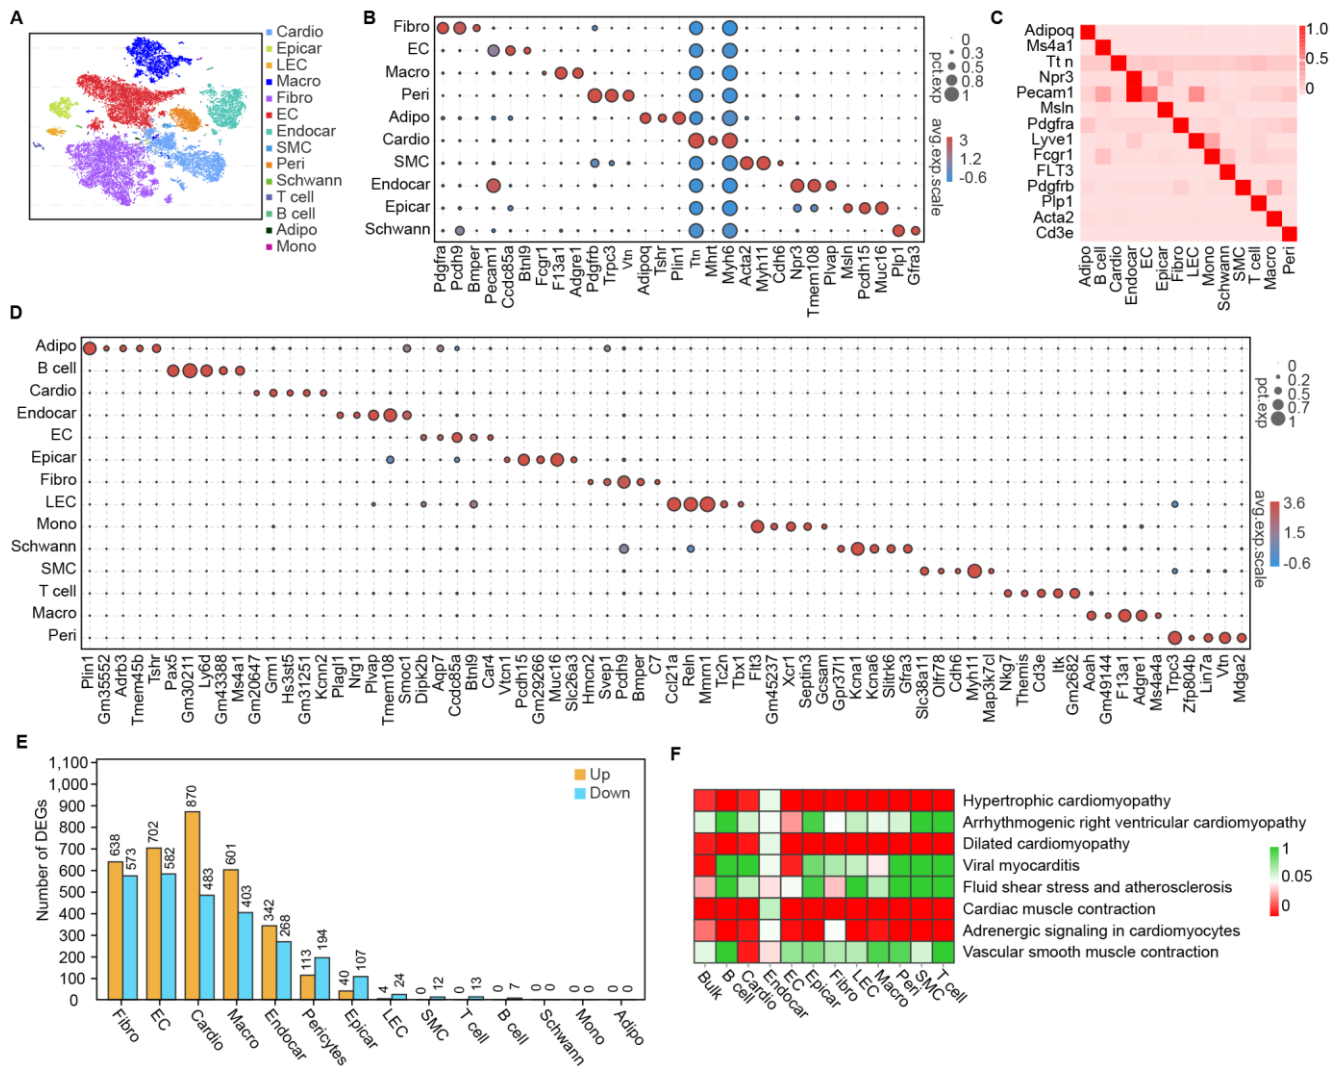

138 **Figure 1.** Single-cell profile of heart in diabetic mice. (A) t-SNE projection of all  
 139 mouse cardiac cells (n = 16490 cardiac cells from 6 control mice and n = 16095  
 140 cardiac cells from 6 diabetic mice). (B) The marker genes defining each type of cell  
 141 cluster in A are listed. The circle size illustrates the proportion of cells expressing  
 142 each transcript within each group. The dot color represents the expression level within  
 143 each population. Color scale: red, high-expressive level; blue, high-expressive level.  
 144 (C) Heat map shows the canonical cell markers of major cardiac cell populations. (D)  
 145 Dot plot represents the top 5 distinct genes for each cell population. (E) Lollipop plot  
 146 shows number of high and low expressed genes in HFD/STZ-treated mouse heart  
 147 cells relative to controls (2-sided Wilcoxon rank-sum test,  $FDR \leq 0.05$ ,  $\log_2FC \geq$   
 148 0.36). (F) Heatmap shows enriched KEGG pathways associated with cardiovascular

149 diseases and circulatory system in each cardiac cell population in the diabetic group.  
150 Color scale: red, low FDR; green, high FDR (2-sided Wilcoxon rank-sum test,  $FDR \leq$   
151 0.05). Adipo, adipocytes; Cardio, cardiomyocytes; Endocar, endocardial cells; EC,  
152 endothelial cells; Epicar, epicardial cells; Fibro, fibroblasts; LEC, lymphatic ECs;  
153 Mono, monocytes; Schwann, schwann cells; SMC, smooth muscle cells; Macro,  
154 macrophages; Peri, pericytes; FDR, false discovery rate. The details of 25  
155 transcriptionally distinct pre-clusters with highly consistent expression patterns across  
156 individual mouse heart are listed in *Supplementary file 1*. Detailed genes of significant  
157 transcriptomic changes in cardiac populations are listed in *Supplementary file 2*. The  
158 details of top 10 upregulated genes in cardiac populations are listed in *Supplementary*  
159 *file 3*.

160 This paper includes the following figure supplement(s) for Figure 1.

161 **Figure supplement 1.** Experimental design and cell type characterization.

162 **Figure supplement 2.** The top 10 upregulated genes during pathology of  
163 HFD/STZ-induced diabetes within each cell population.

164 **Figure supplement 3.** Top 30 enriched KEGG pathways in HFD/STZ-treated mouse  
165 fibroblasts.

166 **Figure supplement 4.** Top 30 enriched KEGG pathways in HFD/STZ-treated mouse  
167 cardiomyocytes, endothelial cells, endocardial cells, and macrophages.

168

169 **Figure 1-Figure supplement 1. Experimental design and cell type characterization.**

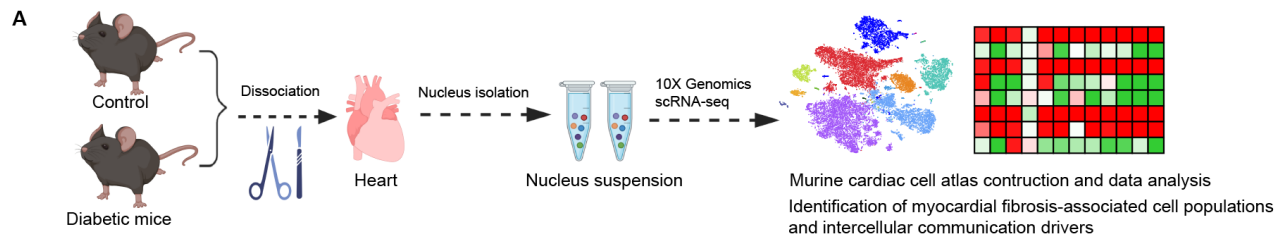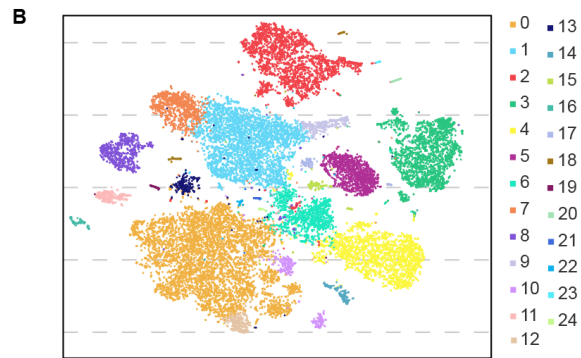

170

171 **Figure 1- Figure supplement 1. Experimental design and cell type characterization.**

172 (A) Schematic overview of experimental design. (B) t-SNE projection of all  
173 pre-clustered cells (n = 16490 cardiac cells from 6 control mice and n = 16095 cardiac  
174 cells from 6 diabetic mice).

175



176 **Figure 1-Figure supplement 2.** The top 10 upregulated genes during pathology of  
177 HFD/STZ-induced diabetes within each cell population.

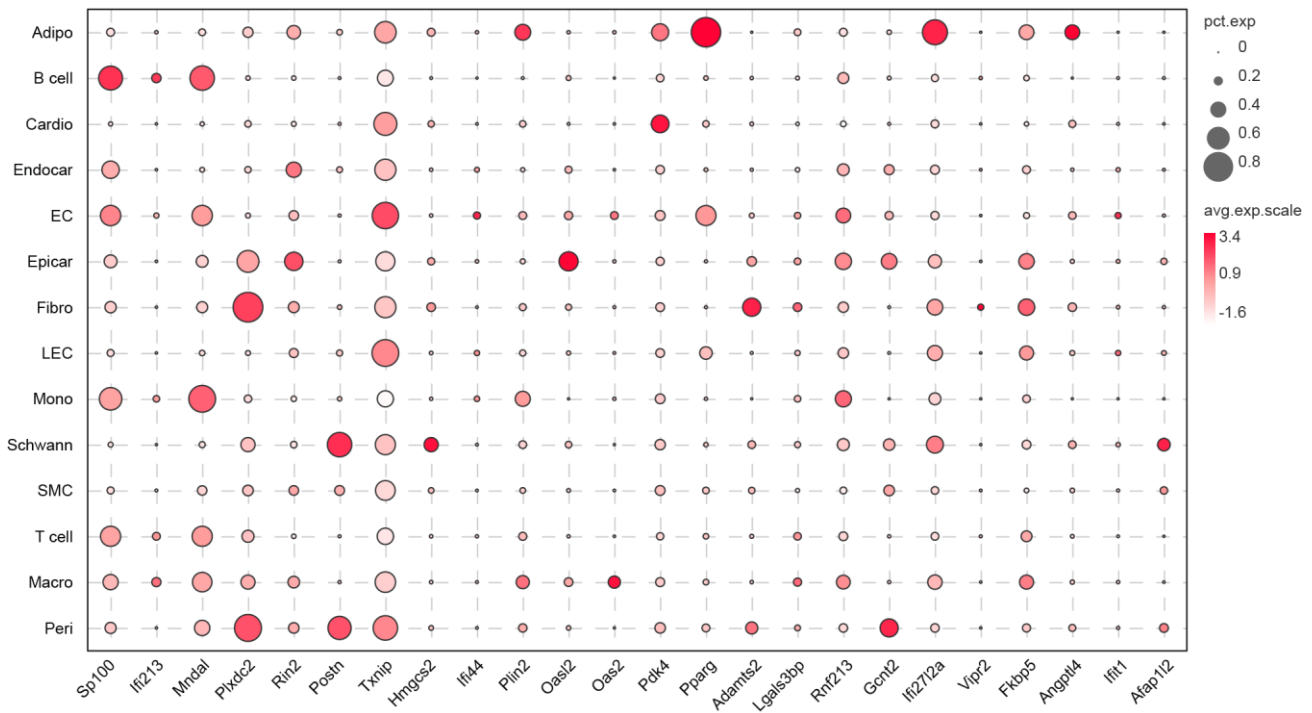

178

179 **Figure 1-Figure supplement 2.** Dot plot represents the top 10 upregulated genes  
180 during pathology of HFD/STZ-induced diabetes within each cell population. The  
181 circle size illustrates the proportion of cells within each transcript, the dot color  
182 indicates the relative average expression level of the gene.

183

184 **Figure 1-Figure supplement 3.** Top 30 enriched KEGG pathways in  
185 HFD/STZ-treated mouse fibroblasts.

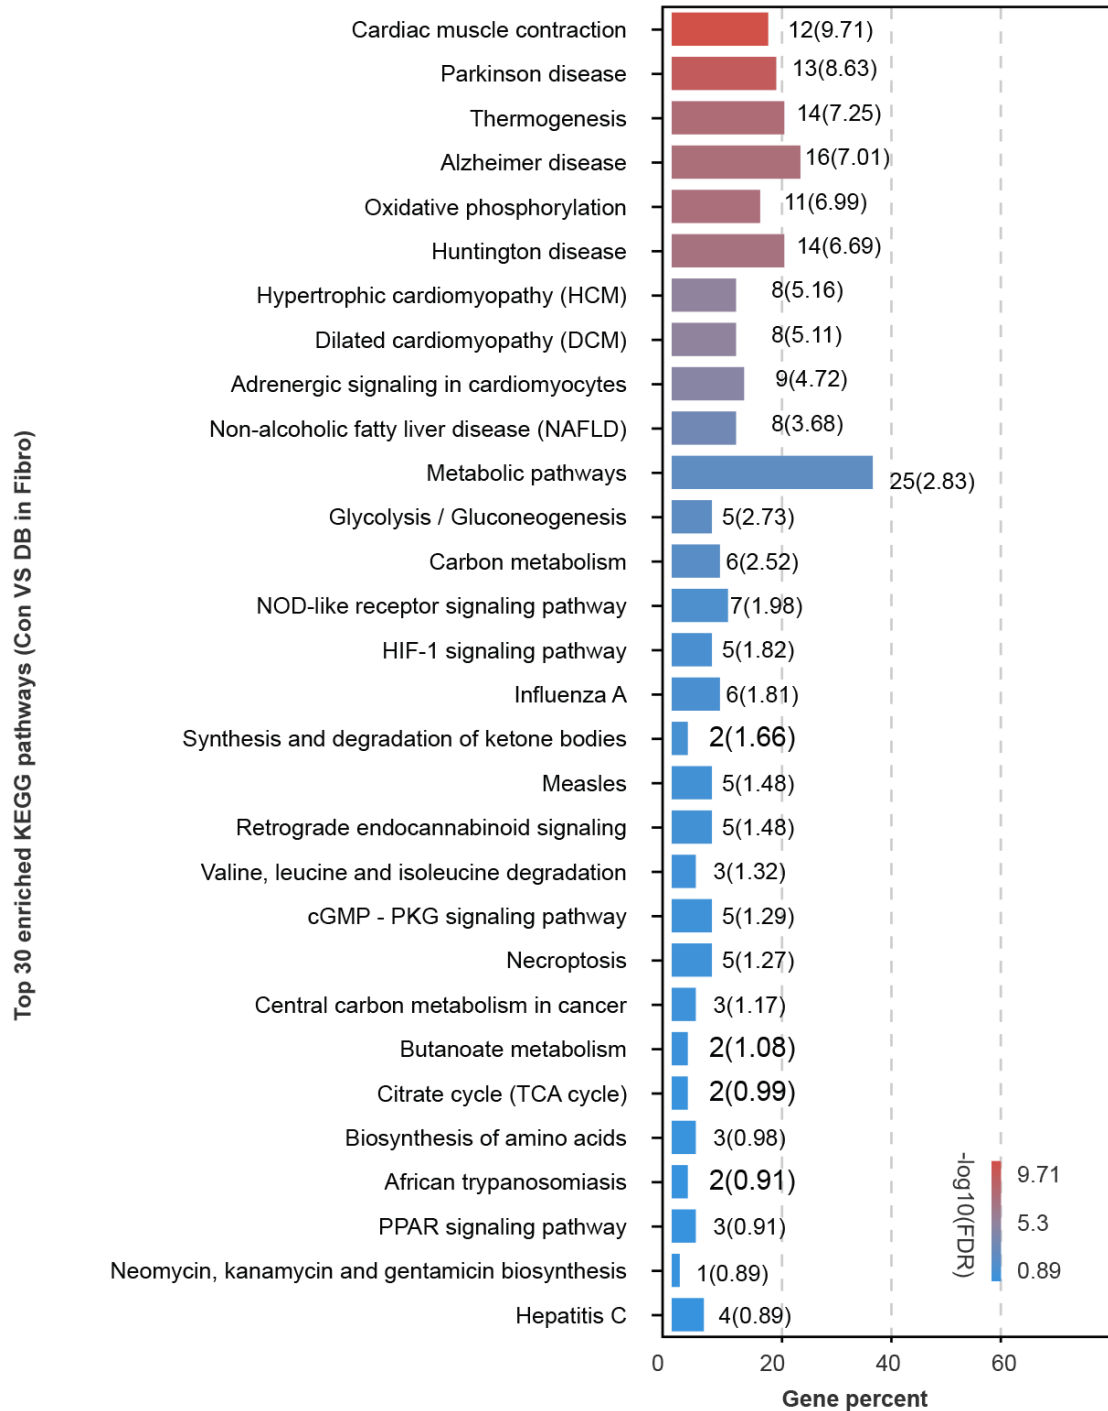

186

187 **Figure1-Figure supplement 3.** Plot shows top 30 enriched KEGG pathways in  
188 HFD/STZ-treated mouse fibroblasts relative to control (2-sided Wilcoxon rank-sum  
189 test,  $\text{FDR} \leq 0.05$ ). Color scale: red, high- $-\log_{10}(\text{FDR})$  value; green, low- $-\log_{10}(\text{FDR})$   
190 value.

191 **Figure 1-Figure supplement 4.** Top 30 enriched KEGG pathways in  
 192 HFD/STZ-treated mouse cardiomyocytes, endothelial cells, endocardial cells, and  
 193 macrophages.

194

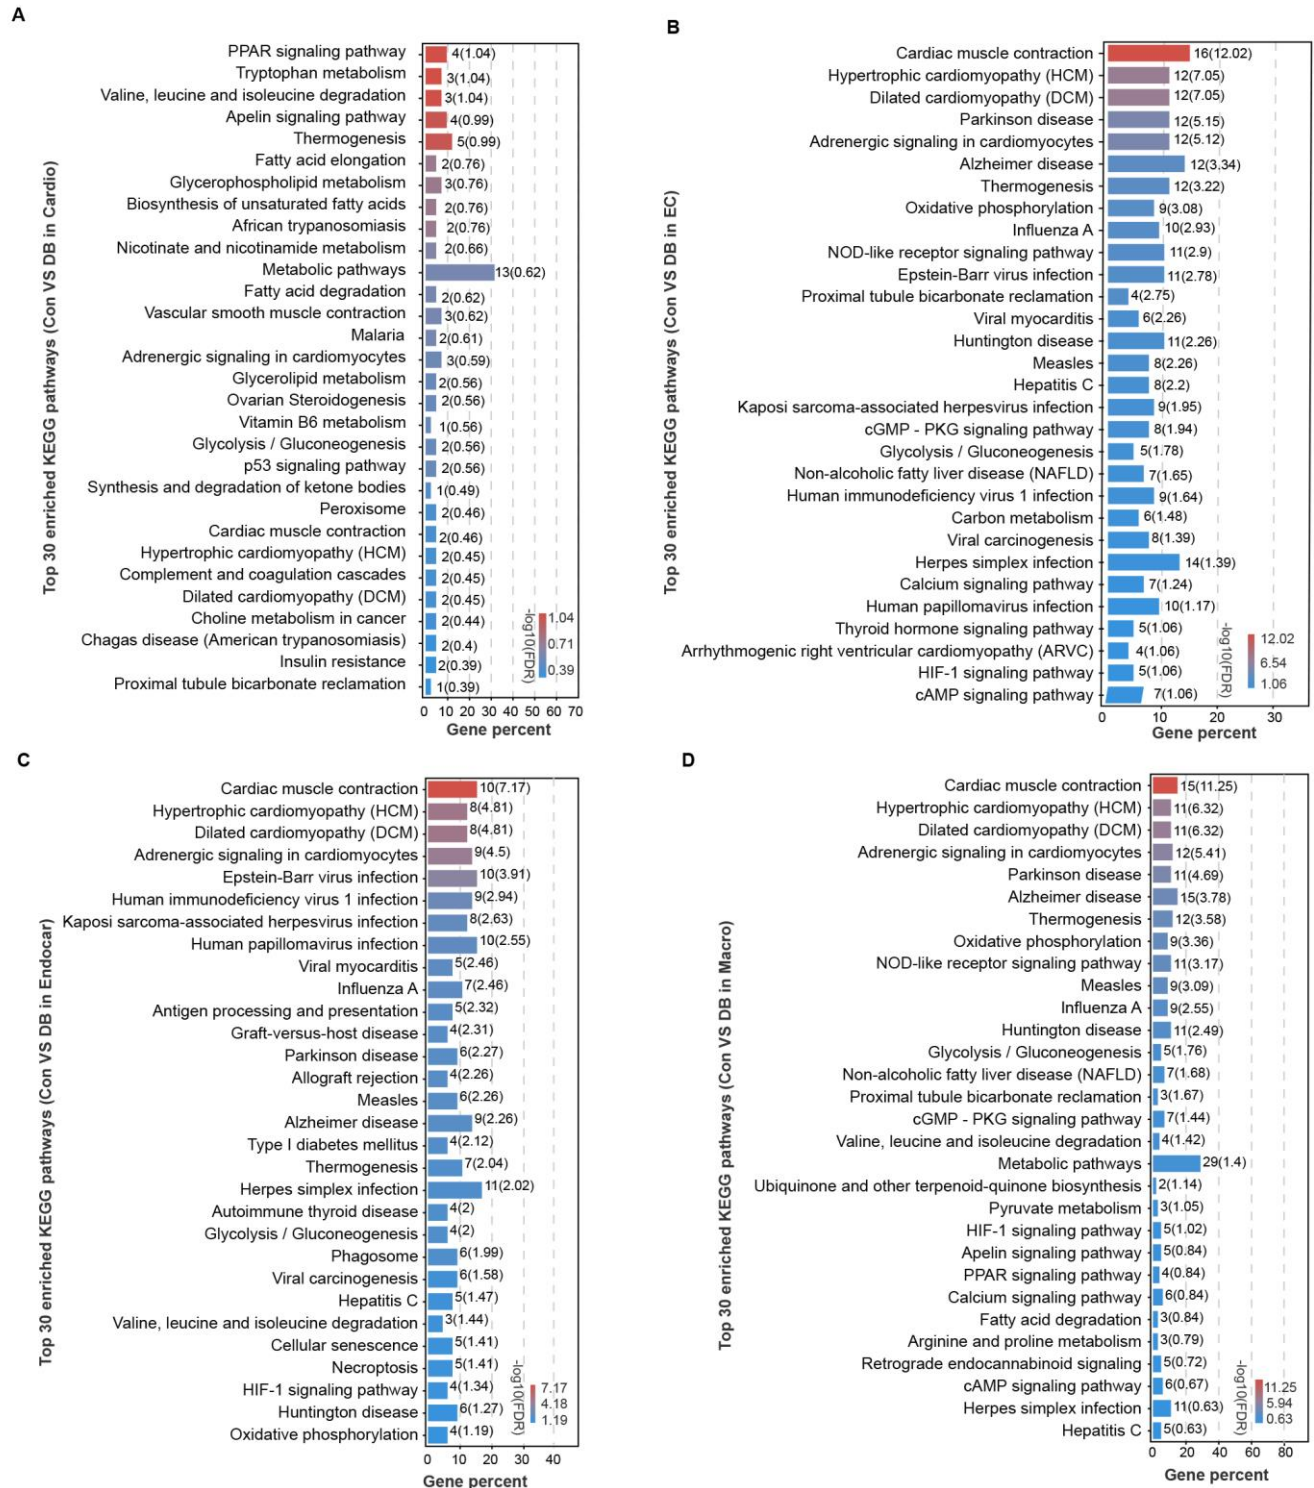

195

196 **Figure 1-Figure supplement 4.** Plot shows top 30 enriched KEGG pathways in  
197 HFD/STZ-treated mouse cardiomyocytes (A), endothelial cells (B), endocardial cells  
198 (C), and macrophages (D) relative to control (2-sided Wilcoxon rank-sum test,  $FDR \leq$   
199 0.05). Color scale: red, high- $\log_{10}(FDR)$  value; green, low- $\log_{10}(FDR)$  value.  
200

## 201 **Effects of HFD/STZ-induced diabetes on cardiac intercellular communication**

202 Cell subpopulations with non-overlapping functions present distinct transcriptomic  
203 perturbations in response to pathological stimuli (*Mathys et al., 2019*). To determine  
204 whether distinct cardiac cell populations response heterogeneously to the diabetic  
205 stimuli, we compared differentially-expressed genes of all cardiac cell types and  
206 identified 2118 unique differentially-expressed genes (uni-DEGs) associated with  
207 major cardiac cell types (Supplementary file 4). Most of the uni-DEGs (96.6%) were  
208 detected in cardiomyocytes (32.8%), fibroblasts (18.5%), macrophages (17.7%),  
209 endothelial cells (19.7%) and endocardial cells (7.9%). The genes most highly  
210 expressed in only each cell type were GM20658 (fibroblasts), Ucp3 (cardiomyocytes),  
211 Spock2 (endocardial cells), Irf7 (endothelial cells) and Ifi206 (macrophages), of  
212 which Ucp3 and Irf7 are involved in heart failure and pathological cardiac  
213 hypertrophy (*Jiang et al., 2014; Senatus et al., 2020*). However, the association of  
214 GM20658, Spock2 and Ifi206 with myocardial fibrosis or heart failure has not been  
215 reported so far. Gene Ontology (GO) analysis of the uni-DEGs (upregulated) showed  
216 that terms associated with collagen fibril organization and extracellular matrix  
217 remodeling were enriched in cardiac fibroblasts (Figure 2A, 2-sided Wilcoxon  
218 rank-sum test,  $FDR \leq 0.05$ ), indicating that fibroblasts are key cellular contributors to  
219 extracellular matrix remodeling and cardiac fibrosis.

220 The proper functioning of metazoans is tightly controlled by the intercellular  
221 communication between multiple cell populations, which is based on interactions  
222 between secretory ligands and receptors. (*Ramilowski et al., 2015*). To determine the  
223 effect of HFD/STZ-induced diabetes on cardiac intracellular communication, we  
224 mapped intercellular connection network of the cardiac cellulome in healthy controls  
225 and diabetic mice. Initially, we identified genes that were differentially expressed in  
226 specific cell populations in the mouse heart, focusing on those over-expressed in a  
227 single cell type, i.e., specific highly-expressed genes, at  $FDR \leq 0.01$  with a minimum  
228 twofold difference in expression (Supplementary file 5). Gene expression patterns for  
229 receptors and ligands were found to be cell type specific in the heart secretome genes

230 analyzed by clustering (Figure 2-Figure supplement 1A and B, Supplementary file 6,  
231 Supplementary file 7). Analysis of the factors that support the growth of specific cell  
232 populations has revealed critical intercellular communication. These include signaling  
233 pathways that support the survival of specific cell populations of mouse hearts (Figure  
234 2B, Supplementary file 8). For instance, pericytes and fibroblasts express Il34 and  
235 CSF1, respectively (Figure 2B), which communicate through CSF1R and are key  
236 factors for macrophage survival and growth. Fibroblasts also express IGF1 and NGF  
237 (Figure 2B), which support the growth of endothelial cells, mural cells and neurons  
238 (*Glebova and Ginty, 2004; Bach, 2015*). To construct a map of intercellular signaling  
239 among heart cells using scRNA-seq data, we integrated them with a ligand-receptor  
240 interaction database (Ramilowski et al., 2015). Results showed that the endothelial  
241 and fibroblast clusters are prominent hubs for autocrine and paracrine signaling  
242 (Figure 2C and D, Supplementary file 9, Supplementary file 10,  $FDR \leq 0.01$ ,  $\log_2FC$   
243  $\geq 1$ ), and that intercellular signaling in response to HFD/STZ-induced diabetes was  
244 changed in all cardiac cells, with fibroblasts increasing the largest number of  
245 connections (Figure 2E-G, Supplementary file 11, Supplementary file 12, 2-sided  
246 Wilcoxon rank-sum test,  $FDR \leq 0.05$ ,  $\log_2FC \geq 0.36$ ). Together, these analyses  
247 suggested that intercellular communications play an important role of the alterations  
248 of cardiac microenvironment of diabetic mice.

249

250

251

252

253 **Figure 2.** Comparison analysis of the communications between cardiac cells during  
 254 HFD/STZ-induced diabetes.

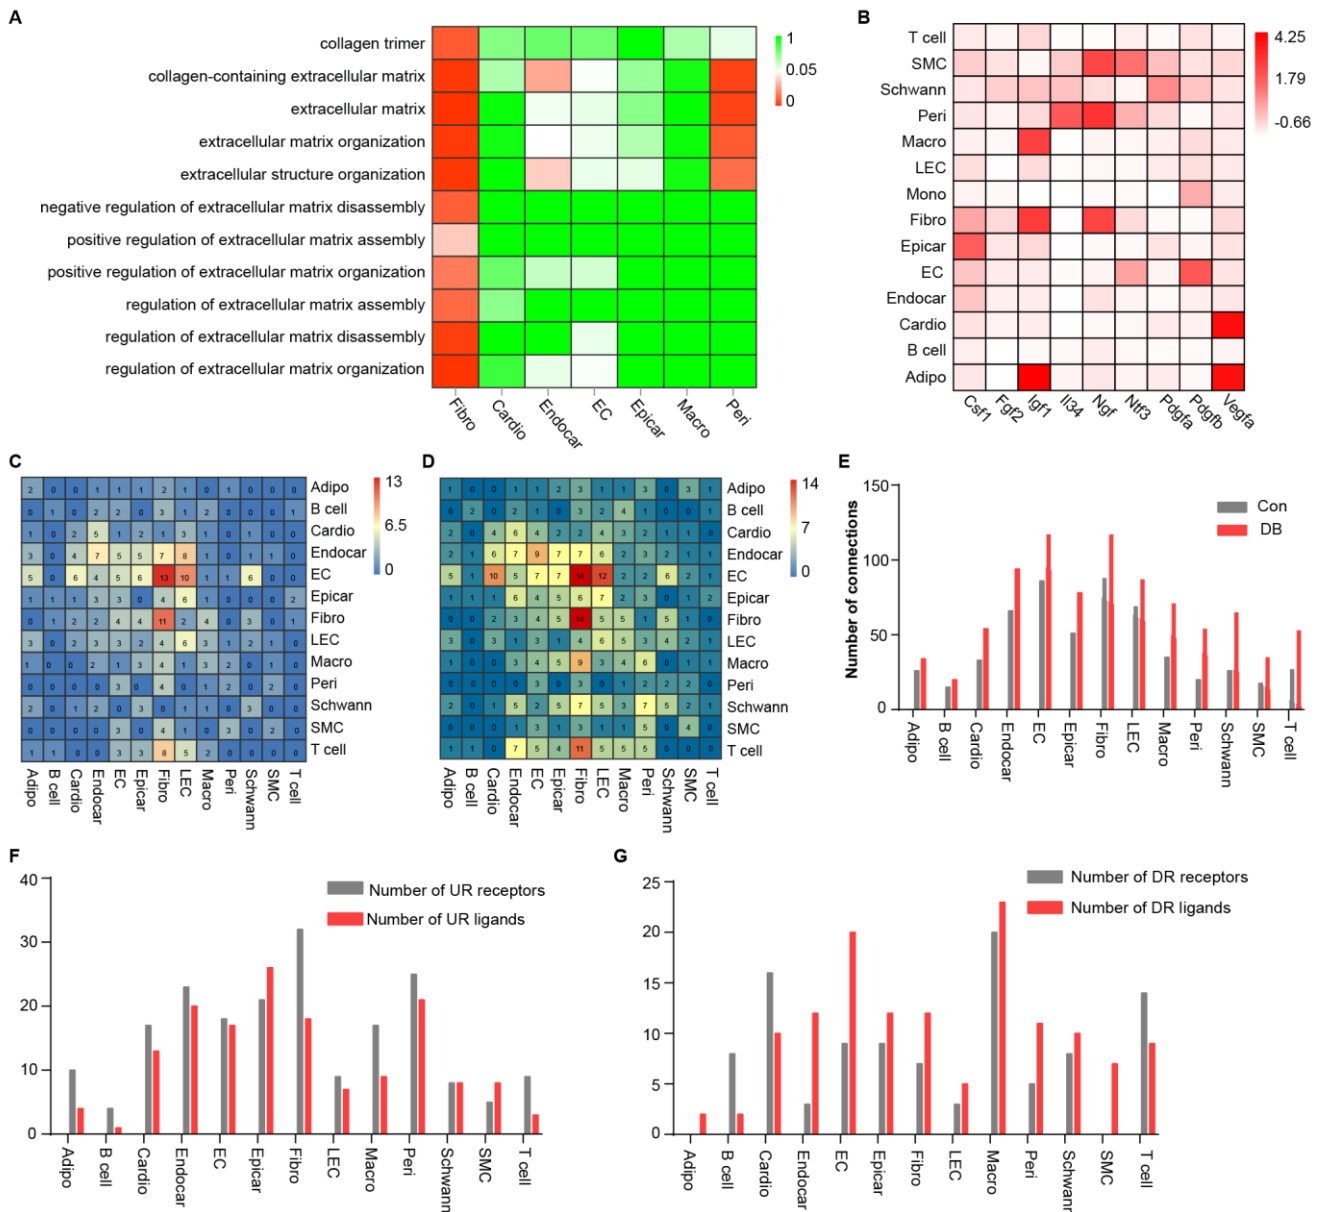

255 **Figure 2.** Comparison analysis of the communications between cardiac cells during  
 256 HFD/STZ-induced diabetes. (A) Heatmap shows enriched GO terms associated with  
 257 extracellular matrix remodeling and myocardial fibrosis in major cardiac cell  
 258 populations in the diabetic group (2-sided Wilcoxon rank-sum test,  $FDR \leq 0.05$ ).  
 259 Color scale: red, low FDR; green, high FDR. (B) The relative expression of selected  
 260 essential growth factors in major cardiac cell types. (C) Heatmap shows the number of  
 261 ligand–receptor pairs between cardiac cell populations in healthy mice ( $FDR \leq 0.01$ ,

262  $\log_2FC \geq 1$ ). (D) Heatmap shows the number of ligand–receptor pairs between  
263 cardiac cell populations in HFD/STZ-induced diabetic mice ( $FDR \leq 0.01$ ,  $\log_2FC \geq 1$ ).  
264 (E) Bar plot shows total number of connections made by each cell type without (gray  
265 bars) and with HFD/STZ treatment (red bars) (2-sided Wilcoxon rank-sum test,  $FDR$   
266  $\leq 0.05$ ,  $\log_2FC \geq 0.36$ ). (F) Bar plot illustrates the number of upregulated receptors  
267 and ligands for each population of cardiac cells (2-sided Wilcoxon rank-sum test,  
268  $FDR \leq 0.05$ ,  $\log_2FC \geq 0.36$ ). (G) Bar plot shows number of downregulated receptors  
269 and ligands for each cardiac cell population. (2-sided Wilcoxon rank-sum test,  $FDR \leq$   
270  $0.05$ ,  $\log_2FC \geq 0.36$ ). DB, diabetes. The details of unique differentially-expressed  
271 genes (uni-DEGs) in cardiac populations are listed in *Supplementary file 4*. The  
272 details of significantly differentially-expressed genes in specific cell populations  
273 relative to others in mouse heart are listed in *Supplementary file 5*. Details of cell  
274 type-specific receptors in cardiac populations and cell type-specific ligands in cardiac  
275 populations are listed in *Supplementary file 6* and *Supplementary file 7*, respectively.  
276 The details of relative expression of a selection of essential growth factors across  
277 major cardiac cell types are listed in *Supplementary file 8*. The details of the number  
278 of ligand-receptor pairs between cardiac cell populations in healthy mice or diabetic  
279 mice are listed in *Supplementary file 9* and *Supplementary file 10*, respectively. The  
280 details of significant differentially-expressed ligands and receptors for each cell  
281 population are listed in *Supplementary file 11* and *Supplementary file 12*, respectively.  
282 This paper includes the following figure supplement(s) for Figure 2.  
283 **Figure supplement 1.** The expression of receptors and ligands across major cardiac  
284 cell types.

285



286 **Figure 2-Figure supplement 1.** The expression of receptors and ligands across major  
287 cardiac cell types.

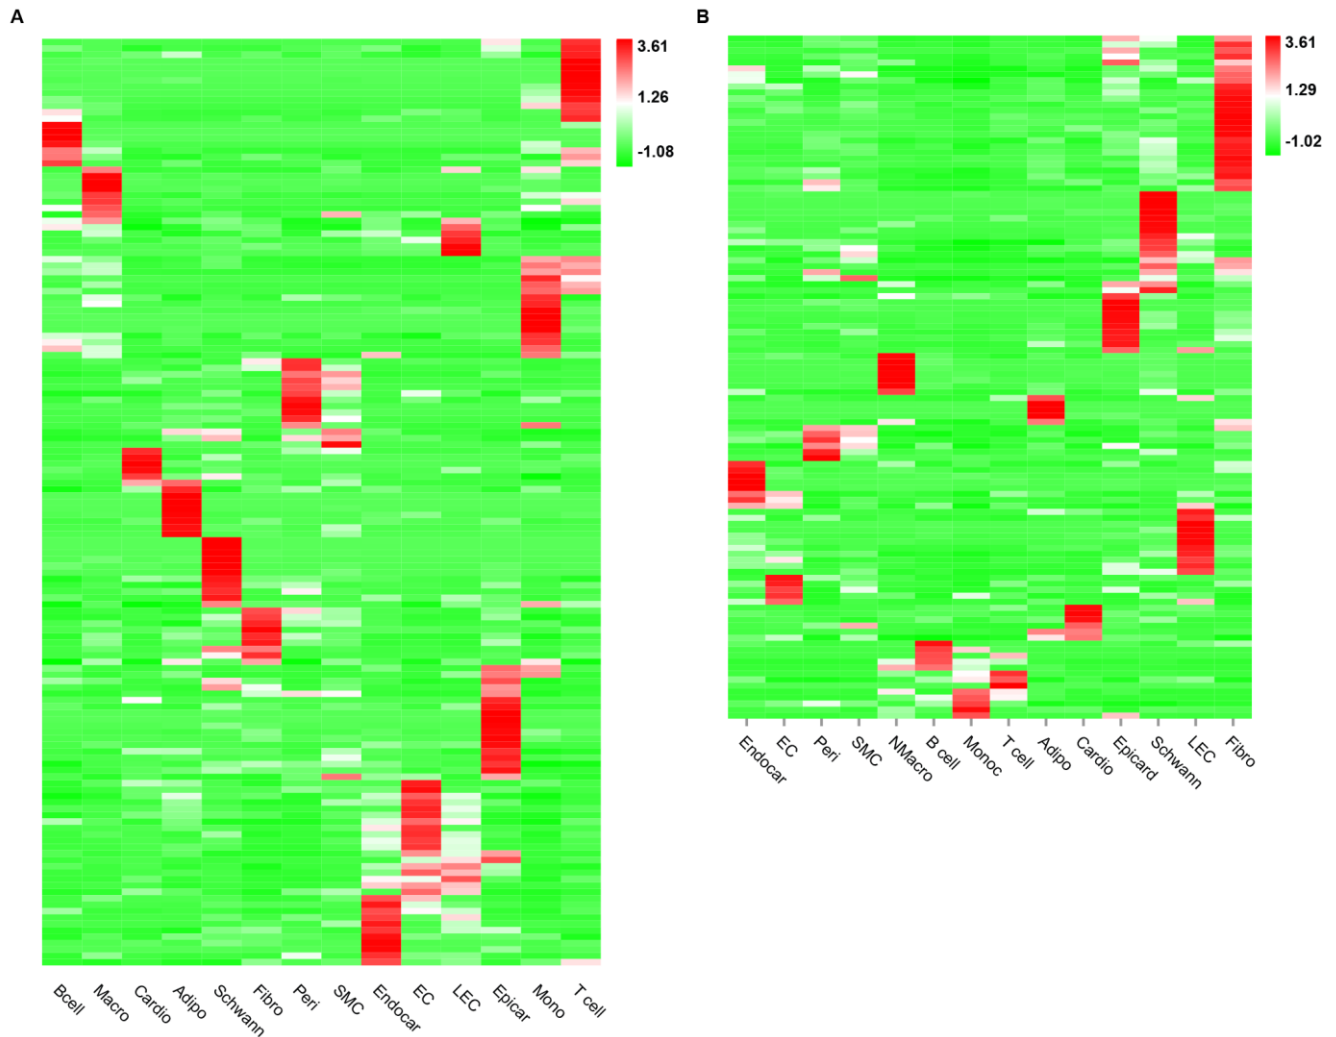

288

289 **Figure 2-Figure supplement 1.** The heatmap shows the relative expression of  
290 receptors (A) and ligands (B) across major cardiac cell populations. Red color  
291 indicates high expression; green color indicates low expression ( $FDR \leq 0.01$ ,  $\log_2FC$   
292  $\geq 1$ ).

293

294

295

296

297 **Identification of key ligand-receptor pairs associated with diabetic myocardial**  
298 **fibrosis in fibroblasts**

299 Cardiac fibroblasts are the primary drivers of myocardial fibrosis (*Travers et al., 2016;*  
300 *Frangogiannis, 2021*). Given the result of cardiac fibroblasts increasing the greatest  
301 number of connections in response to HFD/STZ-induced diabetes, perturbations of  
302 intercellular communications between cardiac fibroblasts and cardiac populations may  
303 be key drivers of diabetic myocardial fibrosis. To investigate the key receptor-ligand  
304 interactions in diabetic myocardial fibrosis, the highly expressed receptors in cardiac  
305 fibroblasts were screened (Figure 3-Figure supplement 1A,  $FDR \leq 0.01$ ,  $\log_2FC \geq 1$ ).  
306 And then, we merged the upregulated uni-DEGs in fibroblasts and the highly  
307 expressed fibroblast receptors, whose cognate ligands were upregulated in at least one  
308 cardiac cell type during diabetic progression (Figure 3A). A protein-protein  
309 interaction (PPI) network was constructed using the new fibroblast-specific gene set  
310 (Figure 3B). Among the top hub genes based on the node degree were *Egfr* and *Pdgfra*,  
311 which were specifically high-expressed receptors in the cardiac fibroblasts (Figure  
312 3-Figure supplement 1B and C). To clarify their role in fibrotic progression, we  
313 screened for the cognate ligands of *Egfr* and *Pdgfra* in each cardiac cell population  
314 (Figure 3-Figure 2A and B, Supplementary file 13 and Supplementary file 14). Both  
315 *Pdgfb* and *Pdgfd* transcripts were upregulated in endothelial cells, and *Pdgfc* levels  
316 was markedly increased in the macrophages of diabetic mice (Figure 3C and D,  
317 2-sided Wilcoxon rank-sum test,  $FDR \leq 0.05$ ,  $\log_2FC \geq 0.36$ ). The protein levels of  
318 *Pdgfb*, *Pdgfd*, and *Pdgfc* showed similar changes in the corresponding cardiac cells  
319 (Figure 3-Figure supplement 1D-F,  $n = 6$  mice per group). In addition, the *Egfr* ligand  
320 *Efemp1* was upregulated in epicardial cells (Figure 3E, 2-sided Wilcoxon rank-sum  
321 test,  $FDR \leq 0.05$ ,  $\log_2FC \geq 0.36$ ). These results suggest that the interaction of cardiac  
322 fibroblasts with endothelial cells, macrophages and epicardial cells through  
323 *Pdgf(s)*-*Pdgfra* and *Efemp1*-*Egfr* may contribute to myocardial fibrosis in diabetic  
324 mouse heart.

325 *Pdgfra* exerts its tyrosine kinase activity through binding with its cognate ligands.

326 Immunostaining of the cardiac tissues revealed significantly higher protein levels of  
327 Pdgfb, Pdgfc and Pdgfd in the Pdgfra positive cells of the diabetic group (Figure  
328 3-Figure supplement 3A-C, n = 6 mice per group). To examine the functional role of  
329 Pdgfra in diabetic myocardial fibrosis, we treated HFD/STZ-induced diabetic mice  
330 with Pdgfra inhibitor imatinib mesylate (Ima). Results showed that HFD/STZ  
331 treatment significantly increased cardiac p-Pdgfra protein levels and decreased that of  
332 p-Pdgfra in the HFD/STZ + Ima group compared to the HFD/STZ group (Figure 3F, n  
333 = 6 mice per group). In addition, the myocardium of the HFD/STZ-treated mice  
334 expressed higher levels of collagen I and III compared with the control group (Figure  
335 3G and H, n = 6 mice per group, mean  $\pm$  SEM, \*\*p < 0.01, \*\*\*p < 0.001), which  
336 coincided with increased collagen deposition in the extracellular matrix. However,  
337 Ima treatment attenuated the increase in HFD/STZ-induced collagen synthesis and  
338 deposition (Figure 3I, n = 6 mice per group). Taken together, Pdgf(s)-Pdgfra  
339 interaction contributes to diabetic myocardial fibrosis.

340

341

342

343

344

345

346

347

348

349

350

351

352

353

354

355

356 **Figure 3.** Identification of key ligand-receptor pairs associated with diabetic  
 357 myocardial fibrosis in fibroblasts.

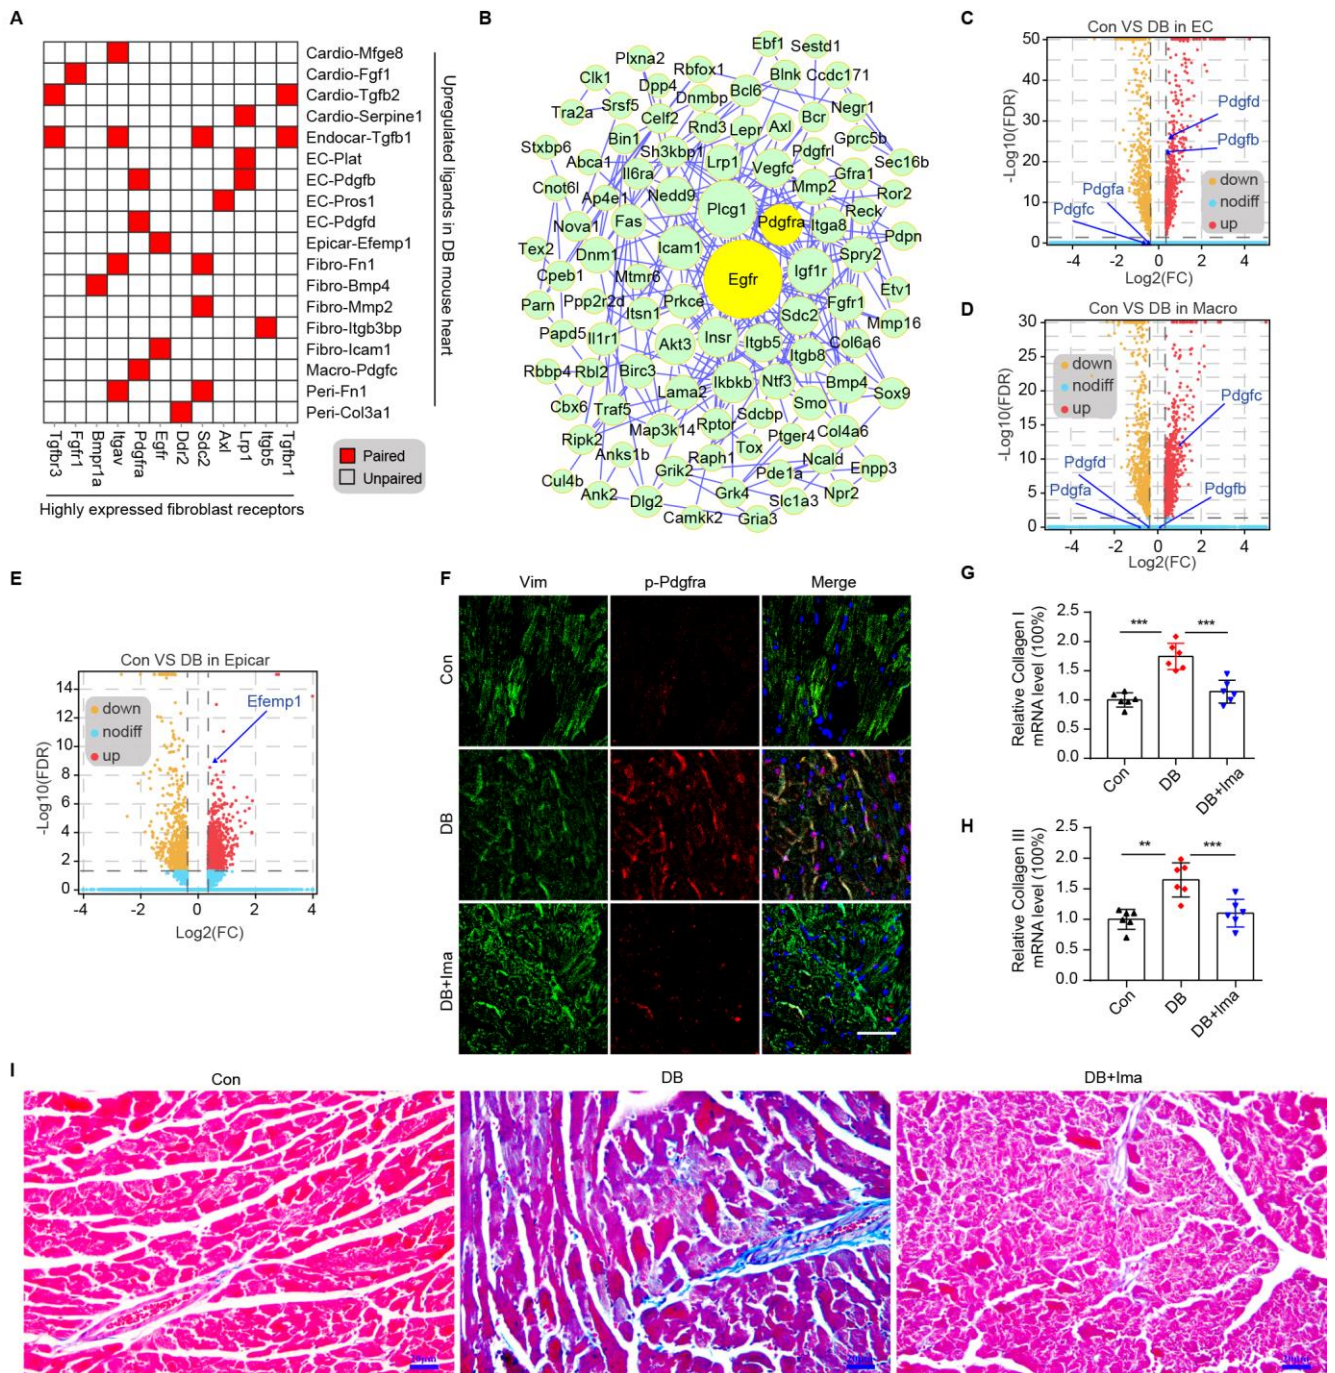

358  
 359 **Figure 3.** Identification of key ligand-receptor pairs associated with diabetic  
 360 myocardial fibrosis in fibroblasts. (A) Heatmap shows pairs of highly expressed  
 361 fibroblast receptors and the upregulated ligands in each cell type of diabetic hearts. (B)  
 362 PPI network shows interaction of up-regulated genes in fibroblasts. The circle size

363 represents the protein node degree in the network. (C, D) Volcano plots of DEGs in  
364 the heart tissues of HFD/STZ-treated and control mice. *Pdgfa*, *Pdgfb*, *Pdgfc* and  
365 *Pdgfd* in endothelial cells (C) and macrophages (D) are highlighted (2-sided Wilcoxon  
366 rank-sum test,  $FDR \leq 0.05$ ,  $\log_2FC \geq 0.36$ ). (E) Volcano plots of DEGs in the hearts  
367 from HFD/STZ-treated and control mice. *Efemp1* in epicardial cells is highlighted  
368 (2-sided Wilcoxon rank-sum test,  $FDR \leq 0.05$ ,  $\log_2FC \geq 0.36$ ). (F) Representative  
369 immunofluorescence images for p-Pdgfra in heart tissues from HFD/STZ-treated mice  
370 with or without Ima treatment (n = 6 mice per group), scale bar = 40  $\mu$ m. (G, H) Bar  
371 plots show mRNA expression of Collagen I (G) and collagen III (H) in heart from  
372 HFD/STZ-treated mice with or without Ima treatment. (n = 6 mice per group; mean  $\pm$   
373 SEM, \*\*p < 0.01, \*\*\*p < 0.001). (I) Representative images of Masson dye-stained  
374 heart sections from the indicated groups showing extent of collagen deposition, (n = 6  
375 mice per group), scale bar = 20 $\mu$ m. Ima, imatinib mesylate; SEM, standard Error of  
376 Mean. The details of cognate ligands of *Egfr* and *Pdgfra* are listed in *Supplementary*  
377 *file 13* and *Supplementary file 14*, respectively.

378 This paper includes the following source data and figure supplement(s) for Figure 3.

379 **Source data 1.** Source data for CT values of Collagen I used for Figure 3G.

380 **Source data 2.** Source data for CT values of Collagen III used for Figure 3H.

381 **Figure supplement 1.** Identification of key ligand-receptor pairs associated with  
382 diabetic myocardial fibrosis in fibroblasts.

383 **Figure supplement 2.** The cognate ligands of *Egfr* in each cardiac cell population.

384 **Figure supplement 3.** Immunofluorescence results of *Pdgfb*, *Pdgfc*, and *Pdgfd* in  
385 *Pdgfra*<sup>+</sup> cells.

386

387

388

389

390

391

392 **Figure 3-Figure supplement 1.** Identification of key ligand-receptor pairs associated  
393 with diabetic myocardial fibrosis in fibroblasts.

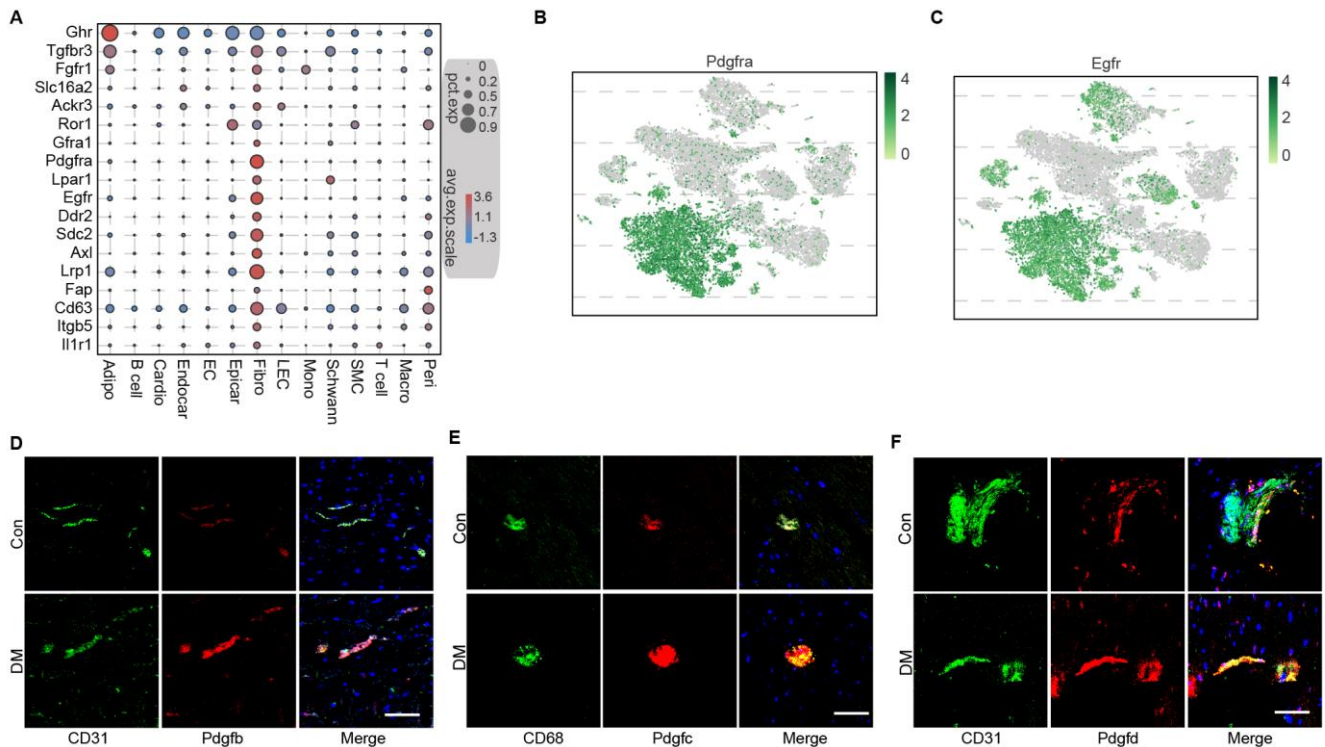

394

395 **Figure 3-Figure supplement 1.** Identification of key ligand-receptor pairs associated  
396 with diabetic myocardial fibrosis in fibroblasts. (A) Dot plot shows the highly  
397 expression of specific receptors in cardiac cell populations ( $FDR \leq 0.01$ ,  $\log_2FC \geq 1$ ).  
398 The circle size indicates the proportion of cells within groups that express each  
399 transcript. The red and blue dots respectively indicate high and low expressed genes.  
400 (B, C) 2-dimensional t-SNE projection of Pdgfra (B) and Egfr (C) expression in  
401 cardiac cell populations. Green and grey colors respectively indicate the high and low  
402 expressed genes. (D-F) Representative immunofluorescence images for Pdgfb (D) and  
403 Pdgfc (E) in CD31+ cells, and Pdgfd (F) in CD68+ cells in the heart tissues of  
404 HFD/STZ-treated and control mice (n = 6 mice per group), scale bar = 100  $\mu$ m.

405

406

407

408 **Figure 3-Figure supplement 2.** The cognate ligands of Egfr in each cardiac cell  
 409 population.

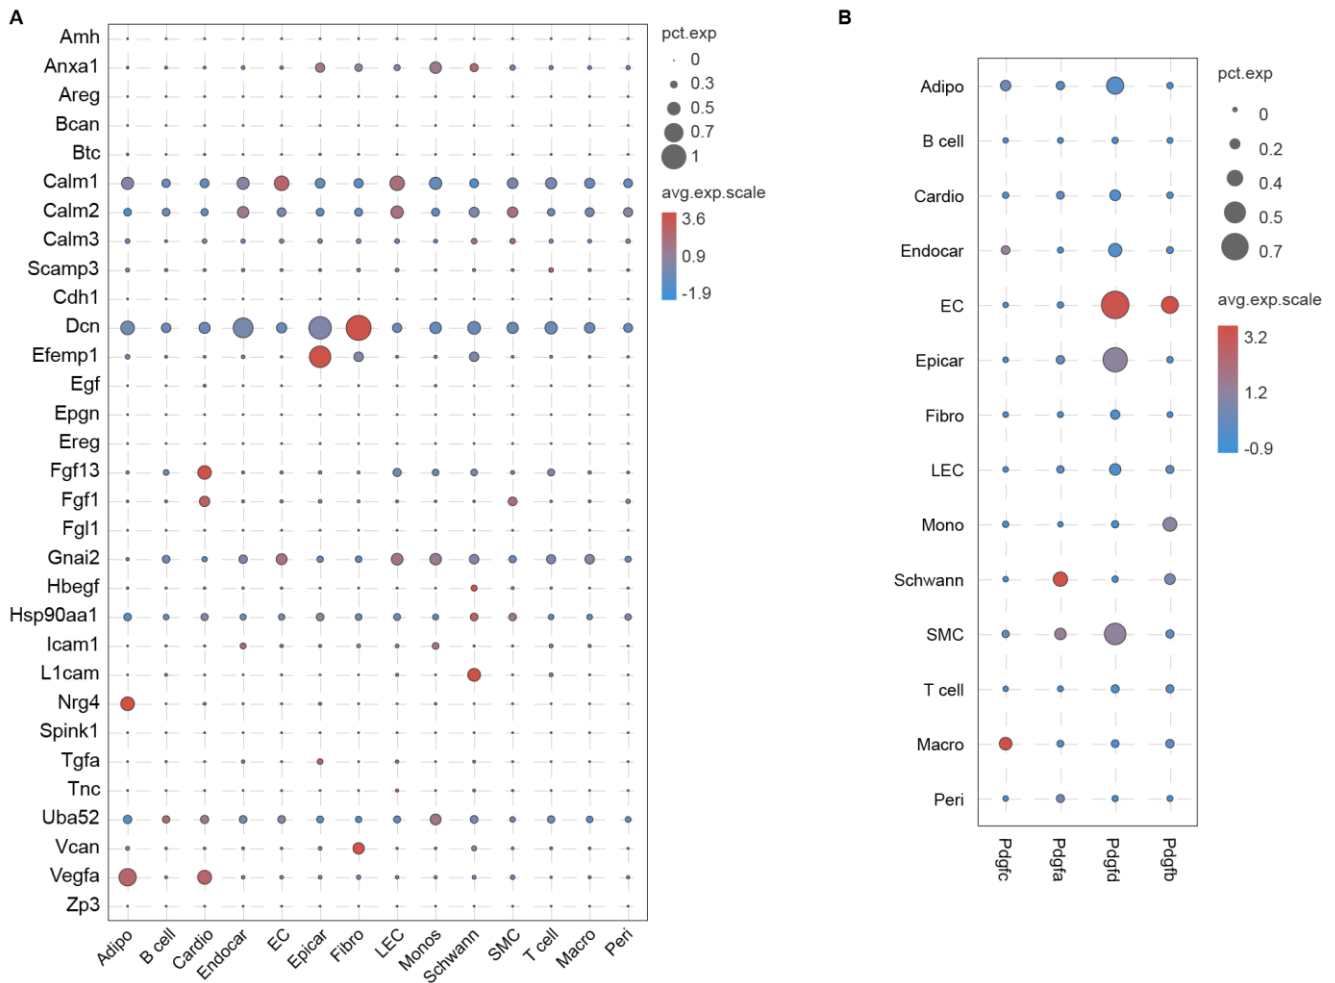

410

411 **Figure 3-Figure supplement 2.** The cognate ligands of Egfr in each cardiac cell  
 412 population. (A) Dot plot showing the cognate ligands of Egfr in each cardiac cell  
 413 population. (B) Dot plot shows the cognate ligands of Pdgfra in cardiac cell  
 414 populations. The circle size indicates the proportion of cells within groups that  
 415 express each transcript. The red and blue dots respectively indicate high and low  
 416 expressed genes.

417

418

419

420 **Figure 3-Figure supplement 3.** Immunofluorescence results of Pdgfb, Pdgfc, and  
421 Pdgfd in Pdgfra<sup>+</sup> cells.

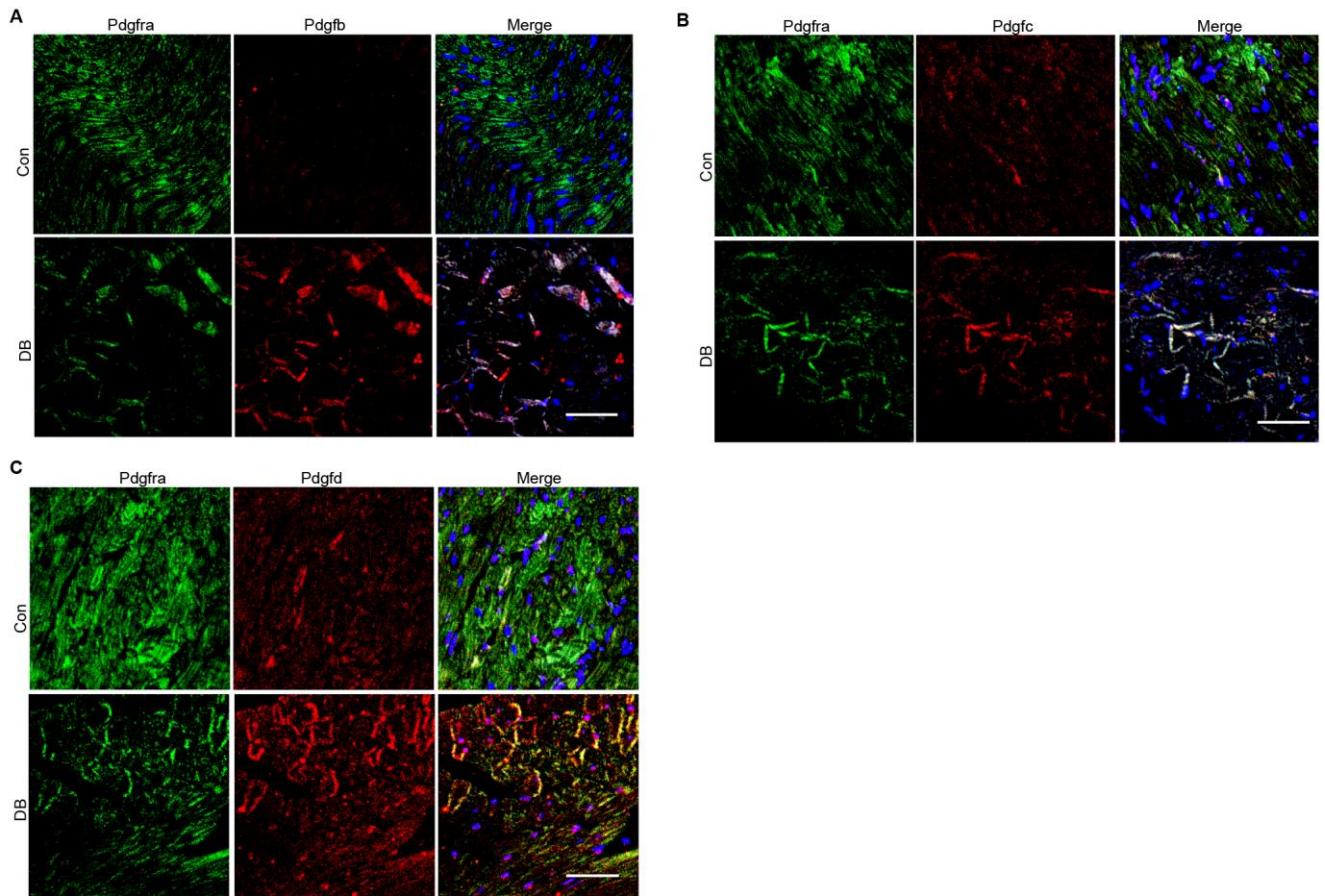

422

423 **Figure 3-Figure supplement 3.** Immunofluorescence results of Pdgfb, Pdgfc, and  
424 Pdgfd in Pdgfra<sup>+</sup> cells. (A-C) Representative immunofluorescence images for Pdgfb  
425 (A), Pdgfc (B) and Pdgfd (C) in Pdgfra<sup>+</sup> cells in the heart tissues of HFD/STZ-treated  
426 and control groups (n = 6 mice per group), scale bar = 40  $\mu$ m.

427

428

429

430

431

432

433



#### 434 **Identification of myocardial fibrosis-related cardiac fibroblast subpopulation**

435 Cell subpopulations in tissues have non-overlapping functions and play different  
436 biological roles. (*Croft et al., 2019*). Cell types can be defined by unbiased clustering  
437 of single cells based on the global transcriptome patterns (*Rozenblatt-Rosen et al.,*  
438 *2017; McLellan et al., 2020*). To observe heterogeneity of fibroblasts in heart, we  
439 examined 6416 fibroblasts from the diabetes and control mice. Unsupervised  
440 Seurat-based clustering of the 6416 fibroblasts revealed ten distinct subpopulations  
441 (Figure 4A, Supplement file 15,  $n = 3428$  fibroblasts from healthy control and  $n =$   
442  $2988$  fibroblasts from 6 diabetic mice). Next, hierarchical clustering with multiscale  
443 bootstrap resampling was used to analyze the heterogeneity of these cardiac fibroblast  
444 subpopulations. This analysis revealed that fibroblast subpopulation 3 formed a  
445 distinct cluster based on its expression pattern from other fibroblast subpopulations  
446 (Figure 4B).

447 We further investigated the contribution of all fibroblast populations to myocardial  
448 fibrosis. The top-5 ranking markers from the heart showed distinct signatures for each  
449 subpopulation of fibroblasts by heatmap analysis (Figure 4C, Supplementary file 16,  
450  $FDR \leq 0.05$ ,  $\log_2FC \geq 0.36$ ). Of note, the top enriched genes in subpopulation 3  
451 (*Nppa* and *Clu*) and subpopulation 5 (*Postn* and *Cilp*) are well-established biomarkers  
452 of pro-fibrotic function. Gene set variation analysis (GSVA) of each fibroblast  
453 subpopulation suggested a diversification of function between the subpopulations, and  
454 fibroblast 3 and 5 populations were strongly involved in extracellular matrix  
455 remodeling and collagen synthesis (Figure 4D,  $FDR \leq 0.05$ ). These results indicated  
456 that fibroblast 3 and 5 subpopulations are myocardial fibrosis-related cardiac  
457 fibroblast subpopulations.

458 The most significantly enriched gene in subpopulation 3 was *Hrc*, which is crucial for  
459 proper cardiac function by regulating  $Ca^{2+}$ -uptake, storage and release. The most  
460 significantly enriched genes of fibroblast subpopulation 5 was *Postn*, which is  
461 consistent with a fibroblast subset identified in an animal model of  
462 angiotensin-induced myocardial hypertrophy (*McLellan et al., 2020*). The *Hrc*<sup>hi</sup> and

463 Postn<sup>hi</sup> fibroblast populations were also detected in mouse heart by immunostaining  
464 for Hrc and Postn respectively (Figure 4E and F, n = 6 mice per group).

465

466

467

468

469

470

471

472

473

474

475

476

477

478

479

480

481

482

483

484

485

486

487

488

489

490

491

492

493 **Figure 4.** Analysis of the heterogeneity of fibroblast subpopulations.

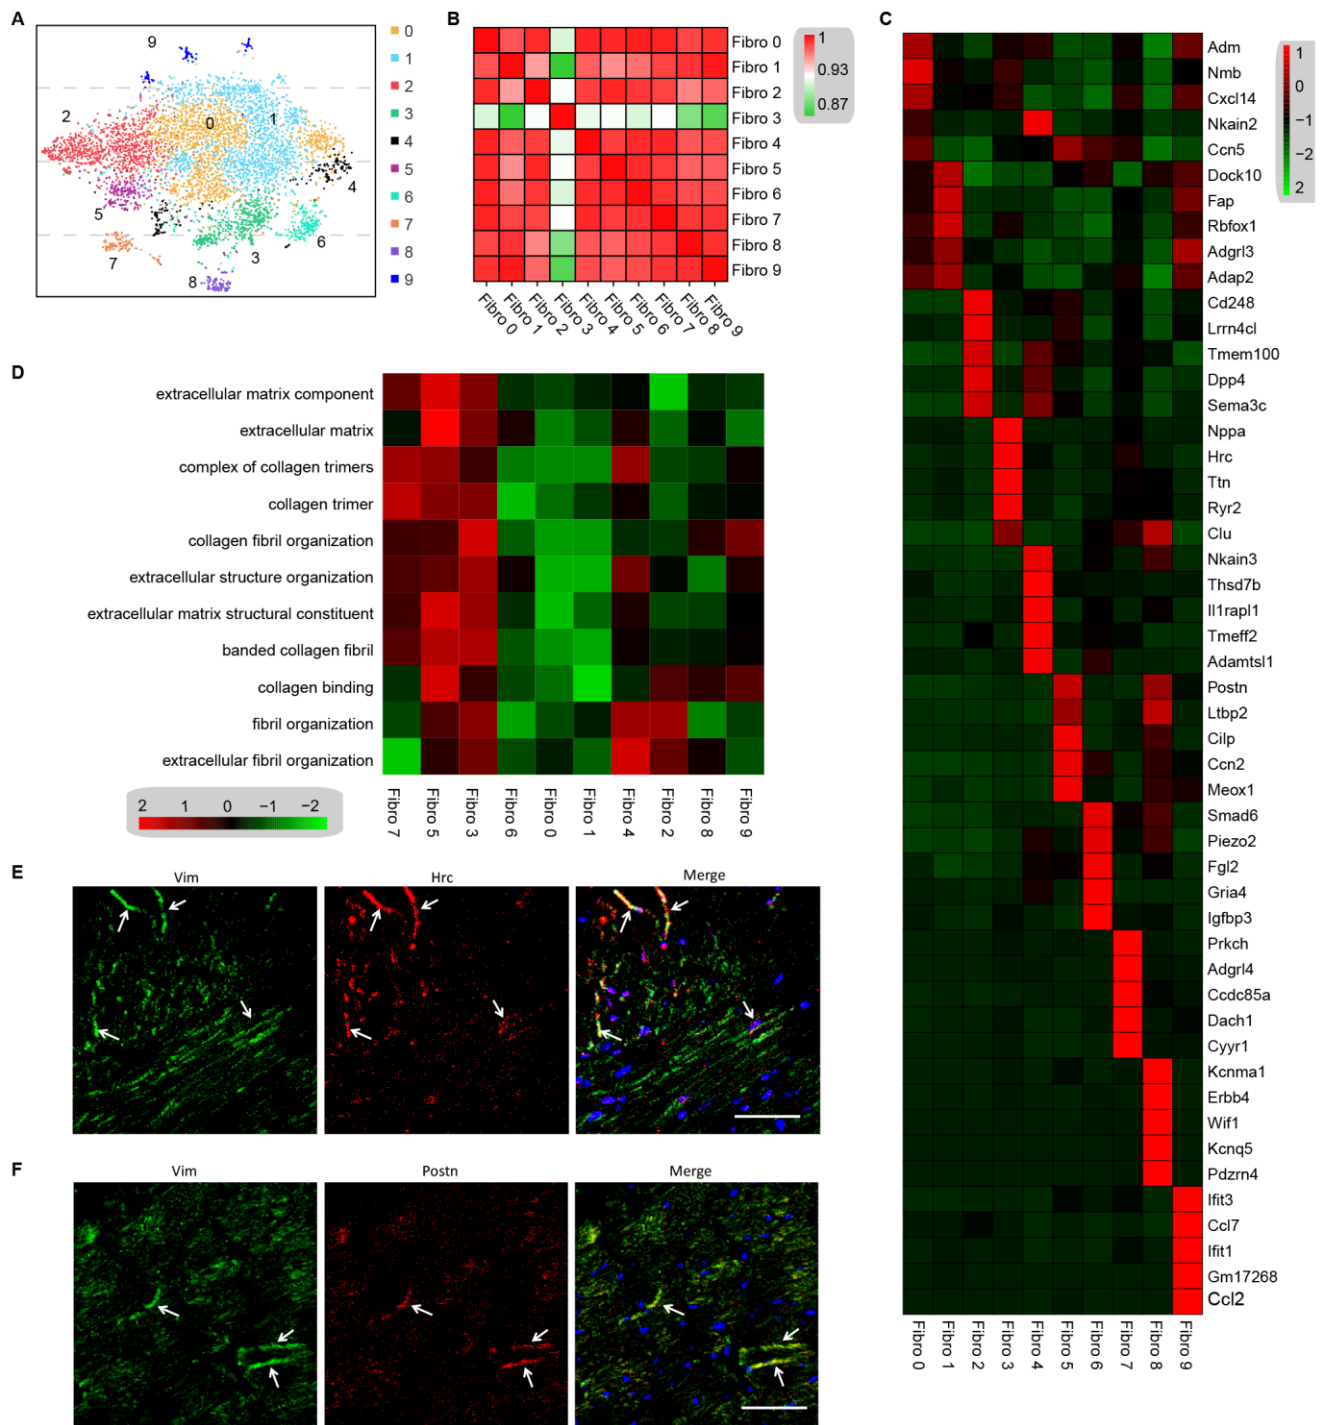

494

495 **Figure 4.** Analysis of the heterogeneity of fibroblast subpopulations. (A) t-SNE plot  
 496 of ten cardiac fibroblast subpopulations from HFD/STZ-treated and control mice (n =  
 497 3428 fibroblasts from healthy control, and n = 2988 fibroblasts from 6 diabetic mice).  
 498 (B) Correlation heatmap of gene-expression signatures of each fibroblast

499 subpopulation. Color differences indicate subpopulations that were resolved by  
500 multiscale bootstrapping. (C) Heatmap shows the top five marker genes for each  
501 fibroblast subpopulation ( $FDR \leq 0.05$ ,  $\log_2FC \geq 0.36$ ). Red color indicates high  
502 expression; green color indicates low expression. (D) Heatmap shows the enriched  
503 GO terms associated cardiac fibrosis in each fibroblast population ( $FDR \leq 0.05$ ).  
504 Color scale: red, low FDR; green, high FDR. (E, F) Representative  
505 immunofluorescence images for Hrc (F) and Postn (G) in mouse heart (n = 6 mice per  
506 group), scale bar = 100  $\mu\text{m}$ . The details of 10 transcriptionally distinct fibroblast  
507 subpopulations are listed in *Supplementary file 15*. The details of distinct signatures of  
508 each fibroblast subpopulations in heart are listed in *Supplementary file 16*.

509

510

511

512

513

514

515

516

517

518

519

520

521

522

523

524

525

526

527

528

## 529 Transcription Factor Network Analysis

530 To investigate the underlying molecular mechanisms that drive the phenotypic  
531 differentiation of fibroblast subpopulations, we used single-cell regulatory network  
532 inference and clustering. Results revealed upregulation of different transcription  
533 factor networks in the distinct subpopulations. For instance, Thra and Creb5 regulons  
534 were upregulated in fibroblast subpopulation 0 and 2 respectively, whereas the Nfe2l1  
535 network was enriched in subpopulation 3 and subpopulation 4 showed increased  
536 activation of the Foxp2 network (Figure 5A, Supplementary file 17). Regulons driven  
537 by the Tcf4 transcription factors were enriched in subpopulations 1 and 9, and Mef2a  
538 was enriched in subpopulations 7 and 8. Consistent with the role of Hmgb1 in cardiac  
539 fibrosis (Wu *et al.*, 2018), a Hmgb1-based network was upregulated in Hrc<sup>hi</sup> and  
540 Postn<sup>hi</sup> fibroblast populations (Figure 5A). Heatmap analysis further confirmed these  
541 upregulated transcription factors (Figure 5B, Supplementary file 18).

542

543 **Figure 5.** Transcription factor network analysis of fibroblast subpopulations.

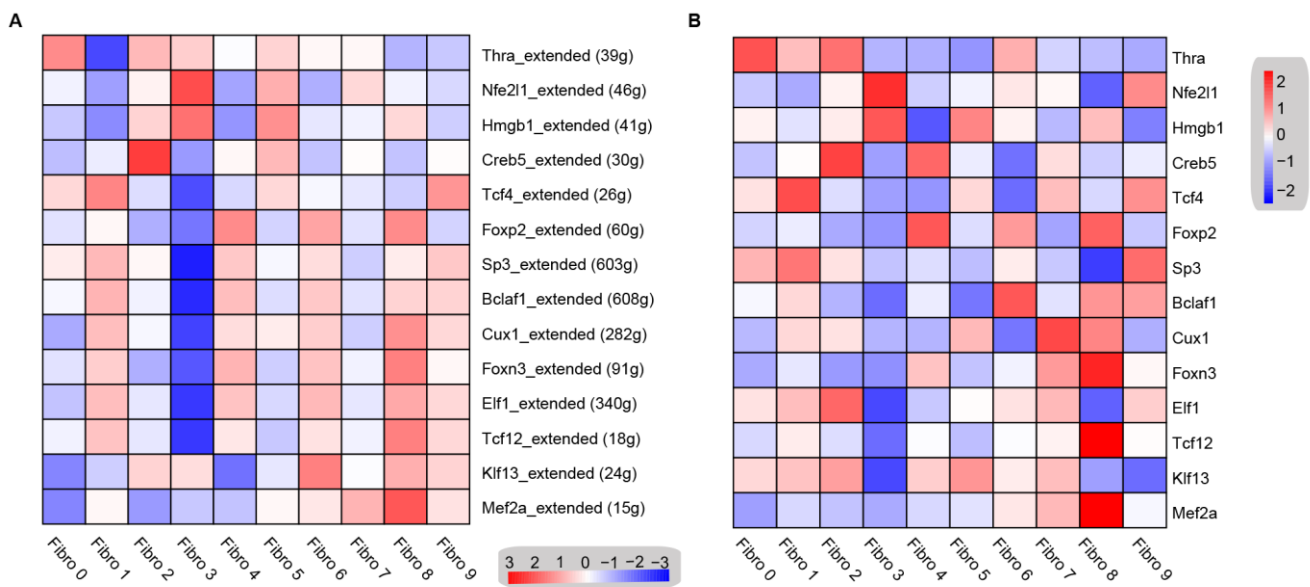

544 **Figure 5.** Transcription factor network analysis of fibroblast subpopulations. (A)  
545 Heatmap shows the inferred transcription-factor gene-regulatory networks. Numbers  
546 between brackets indicate the (extended) regulons for respective transcription factors.  
547 (B) Heatmap shows the expression level of transcription factors in (A). Red color  
548 indicates high expression; green color indicates low expression. The details of

549 transcription-factor gene-regulatory networks in the distinct subpopulations are listed  
550 in *Supplementary file 17*. The details of transcription factors expression are listed in  
551 *Supplementary file 18*.  
552

553 **Identification of intercellular communication drivers of myocardial fibrosis in**  
554 **Hrc<sup>hi</sup> fibroblasts**

555 To identify the cellular drivers of myocardial fibrosis during diabetes, we performed a  
556 cluster analysis of the DEGs between control and diabetic mice heart. HFD/STZ  
557 treatment induced transcriptional changes in all cardiac fibroblast subpopulations  
558 (Figure 6-Figure supplement 1, Supplementary file 19, 2-sided Wilcoxon rank-sum  
559 test,  $FDR \leq 0.05$ ,  $\log_2FC \geq 0.36$ ), and the upregulated genes in Hrc<sup>hi</sup> fibroblasts were  
560 enriched in GO terms such as collagen fiber reorganization and extracellular matrix  
561 binding (Figure 6A, 2-sided Wilcoxon rank-sum test,  $FDR \leq 0.05$ ). Furthermore, the  
562 top 20 enriched pathways in the Hrc<sup>hi</sup> fibroblasts of the diabetic group were related to  
563 extracellular matrix organization, myocardial fibrosis and fibroblast activation (Figure  
564 6B, 2-sided Wilcoxon rank-sum test,  $FDR \leq 0.05$ ). These results suggested that the  
565 Hrc<sup>hi</sup> fibroblasts are the key cellular driver of myocardial fibrosis in response to  
566 HFD/STZ-induced diabetes.

567 To identify the critical signaling molecules in Hrc<sup>hi</sup> fibroblasts that mediate  
568 myocardial fibrosis in the diabetic setting, we identified the uni-DEGs in each  
569 fibroblast subpopulation (Supplementary file 20) and constructed a PPI network using  
570 the upregulated genes (Figure 6C). The top 15 hub genes included Itgb1, Col6a1,  
571 Colla2, Dcn, Rpl6, Rps20, Serpinh1, Bgn, Hsp90aa1 and Col6a2, of which Col6a1,  
572 Colla2, Col6a2, Dcn and Bgn encode for ECM proteins (*Schipke et al., 2017*). In  
573 addition, both Serpinh1 and Hsp90aa1 have been reported to participate in collagen  
574 synthesis (*Christiansen et al., 2010; García et al., 2016*). Although the role of these  
575 candidate hub genes has been well established in myocardial fibrosis, the functions of  
576 Itgb1 is currently unknown.

577 The PPI network of the upregulated uni-DEGs indicated the key role of Itgb1 of Hrc<sup>hi</sup>  
578 fibroblasts in diabetic myocardial fibrosis (Figure 6D,  $n = 6$  mice per group; Figure  
579 6E, Figure 6-Figure supplement 2, 2-sided Wilcoxon rank-sum test,  $FDR \leq 0.05$ ,  
580  $\log_2FC \geq 0.36$ ). Itgb1 deficiency increased the risk of ventricular arrhythmias in  
581 patients with arrhythmogenic right ventricular cardiomyopathy (Wang et al., 2020). It

582 is therefore reasonable to surmise that the interaction of Itgb1 with its cognate ligand  
583 is involved in diabetes-related myocardial fibrosis. To confirm this hypothesis, we  
584 screened all potential ligands of Itgb1 (Supplementary file 21), and found that  
585 Lgals3bp and Fn1 were upregulated in the heart tissues of diabetic mice (Figure 6F-G,  
586 n = 6 mice per group).

587 To validate the role of Itgb1 in heart for myocardial fibrosis during diabetes, we used  
588 the adeno-associated virus 9 (AAV9) to deliver Itgb1 siRNA, which preferentially  
589 target heart. The level of Itgb1 mRNA decreased by >80% in response to a single  
590 injection of Itgb1 siRNA compared to negative control (Figure 6H, n = 6 mice per  
591 group, mean  $\pm$  SEM, \*\*\*\*p < 0.0001). Moreover, the knockdown of Itgb1 lasted for  
592 more than 5 months after injection of siRNA. Next, we tested the collagen synthesis  
593 and deposition in diabetic mouse heart with Itgb1 knockdown by Masson dye-staining.  
594 Results showed that levels of the collagen synthesis and deposition were indeed  
595 reduced in Itgb1 knockout mice (Figure 6I, n = 6 mice per group). Taken together,  
596 Itgb1 in Hrc<sup>hi</sup> fibroblasts contributes to HFD/STZ-induced myocardial fibrosis.  
597 Further studies are warranted to establish the roles of these ligand-receptor  
598 interactions in diabetic myocardial fibrosis.

599

600

601

602

603

604

605

606

607

608



609 **Figure 6.** Identification of intercellular communication drivers of myocardial fibrosis  
 610 in Hrc<sup>hi</sup> fibroblasts.

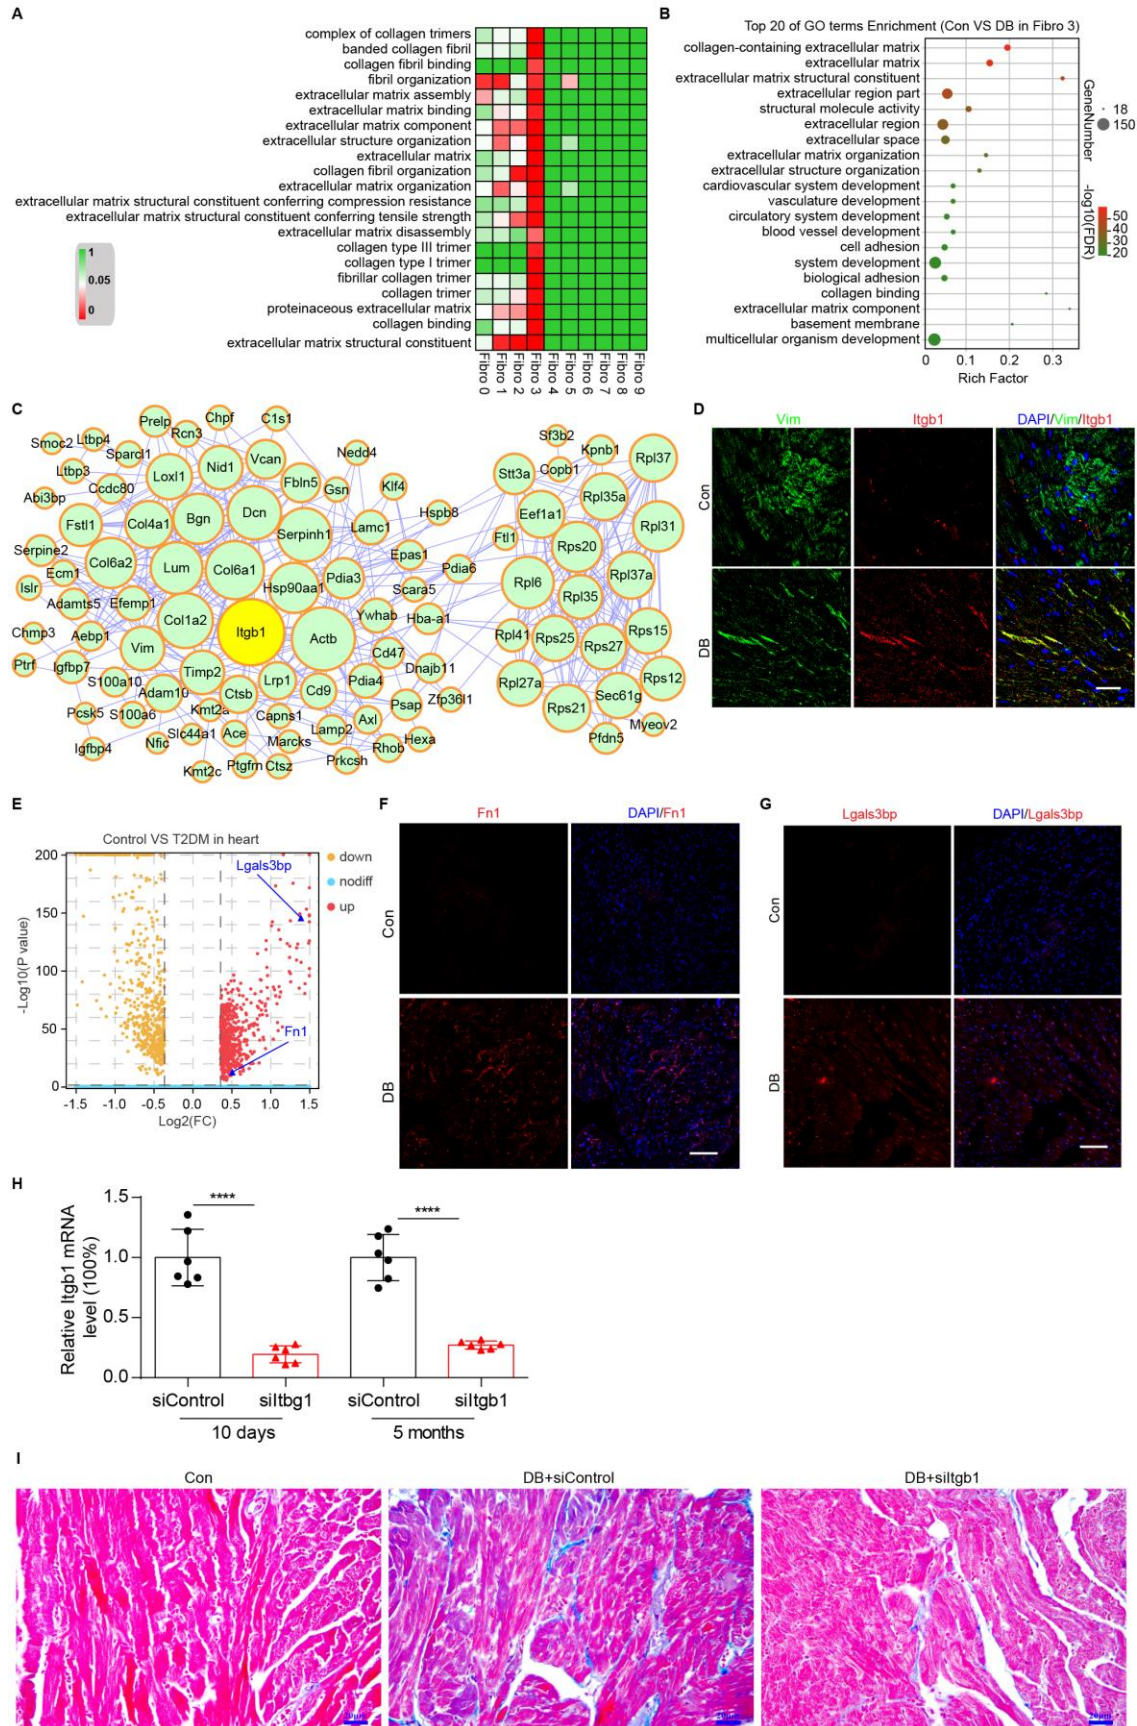

611 **Figure 6.** Identification of intercellular communication drivers of myocardial fibrosis  
612 in Hrc<sup>hi</sup> fibroblasts. (A) Heatmap shows HFD/STZ-induced enrichment of GO terms  
613 associated with extracellular matrix remodeling and myocardial fibrosis in each  
614 subpopulation of cardiac fibroblasts (2-sided Wilcoxon rank-sum test,  $FDR \leq 0.05$ ).  
615 Color scale: red, low FDR value; green, high FDR value. (B) Dot plot of GO analysis  
616 shows the top 20 terms with the highest enrichment in Hrc<sup>hi</sup> fibroblasts in the  
617 HFD/STZ-treated mice relative to controls (2-sided Wilcoxon rank-sum test,  $FDR \leq$   
618 0.05). Bars are color-coded from blue to red based on the FDR. (C) PPI network  
619 shows interaction of up-regulated genes in Hrc<sup>hi</sup> fibroblasts of diabetic mice relative to  
620 controls. The circle size represents the protein node degree in the network. (D)  
621 Representative immunofluorescence images for Itgb1 in heart from SHH-fed or  
622 control mice (n = 6 mice per group), scale bar = 40  $\mu$ m. (E) Volcano plots shows  
623 DEGs in the heart tissues from HFD/STZ-treated or control mice with Fn1 and  
624 Lgals3bp highlighted (2-sided Wilcoxon rank-sum test,  $FDR \leq 0.05$ ,  $\log_2FC \geq 0.36$ ).  
625 (F, G) Representative immunofluorescence images for Fn1 (F) and Lgals3bp (G) in  
626 mouse heart (n = 6 mice per group), scale bar = 100  $\mu$ m. (H) The efficiency of  
627 siRNA-mediated Itgb1 mRNA knockdown was confirmed by qRT-PCR (n = 6 mice  
628 per group, mean  $\pm$  SEM, \*\*\*\*p < 0.0001). (I) Representative images of Masson  
629 dye-stained heart sections from the indicated groups showing extent of collagen  
630 deposition (n = 6 mice per group), scale bar = 20 $\mu$ m. Detailed genes of significant  
631 transcriptomic changes in each fibroblast subpopulation are listed in *Supplementary*  
632 *file 19*. The details of unique differentially-expressed genes (uni-DEGs) in each  
633 fibroblast subpopulation are listed in *Supplementary file 20*. The details of the cognate  
634 ligands of Itgb1 are listed in *Supplementary file 21*.  
635 This paper includes the following source data and figure supplement(s) for Figure 6.  
636 **Source data 1.** Source data for CT values of Itgb1 used for Figure 6H.  
637 **Source data 2.** Source data for CT values of Itgb1 used for Figure 6H.  
638 **Figure supplement 1.** Up- and downregulated genes in each fibroblast subpopulation  
639 of diabetic versus control mice.

640 **Figure supplement 2.** DEGs in each cardiac fibroblast subpopulation from  
641 HFD/STZ-treated or control mice with Itgb1 highlighted.

642

643 **Figure 6-Figure supplement 1.** Up- and downregulated genes in each fibroblast  
644 subpopulation of diabetic versus control mice.

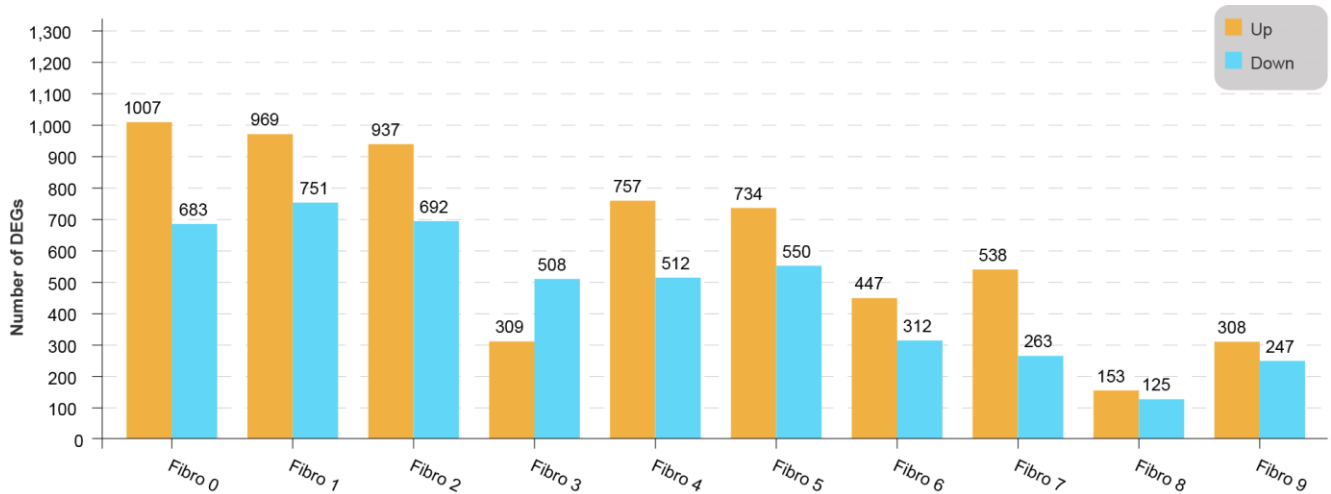

645

646 **Figure 6-Figure supplement 1.** Lollipop plot shows the up- and downregulated  
647 genes in each fibroblast subpopulation of diabetic versus control mice (2-sided  
648 Wilcoxon rank-sum test,  $FDR \leq 0.05$ ,  $\log_2FC \geq 0.36$ ).

649

650

651

652

653

654

655

656

657

658

659

660

661 **Figure 6-Figure supplement 2.** DEGs in each cardiac fibroblast subpopulation from  
662 HFD/STZ-treated or control mice with *Itgb1* highlighted.

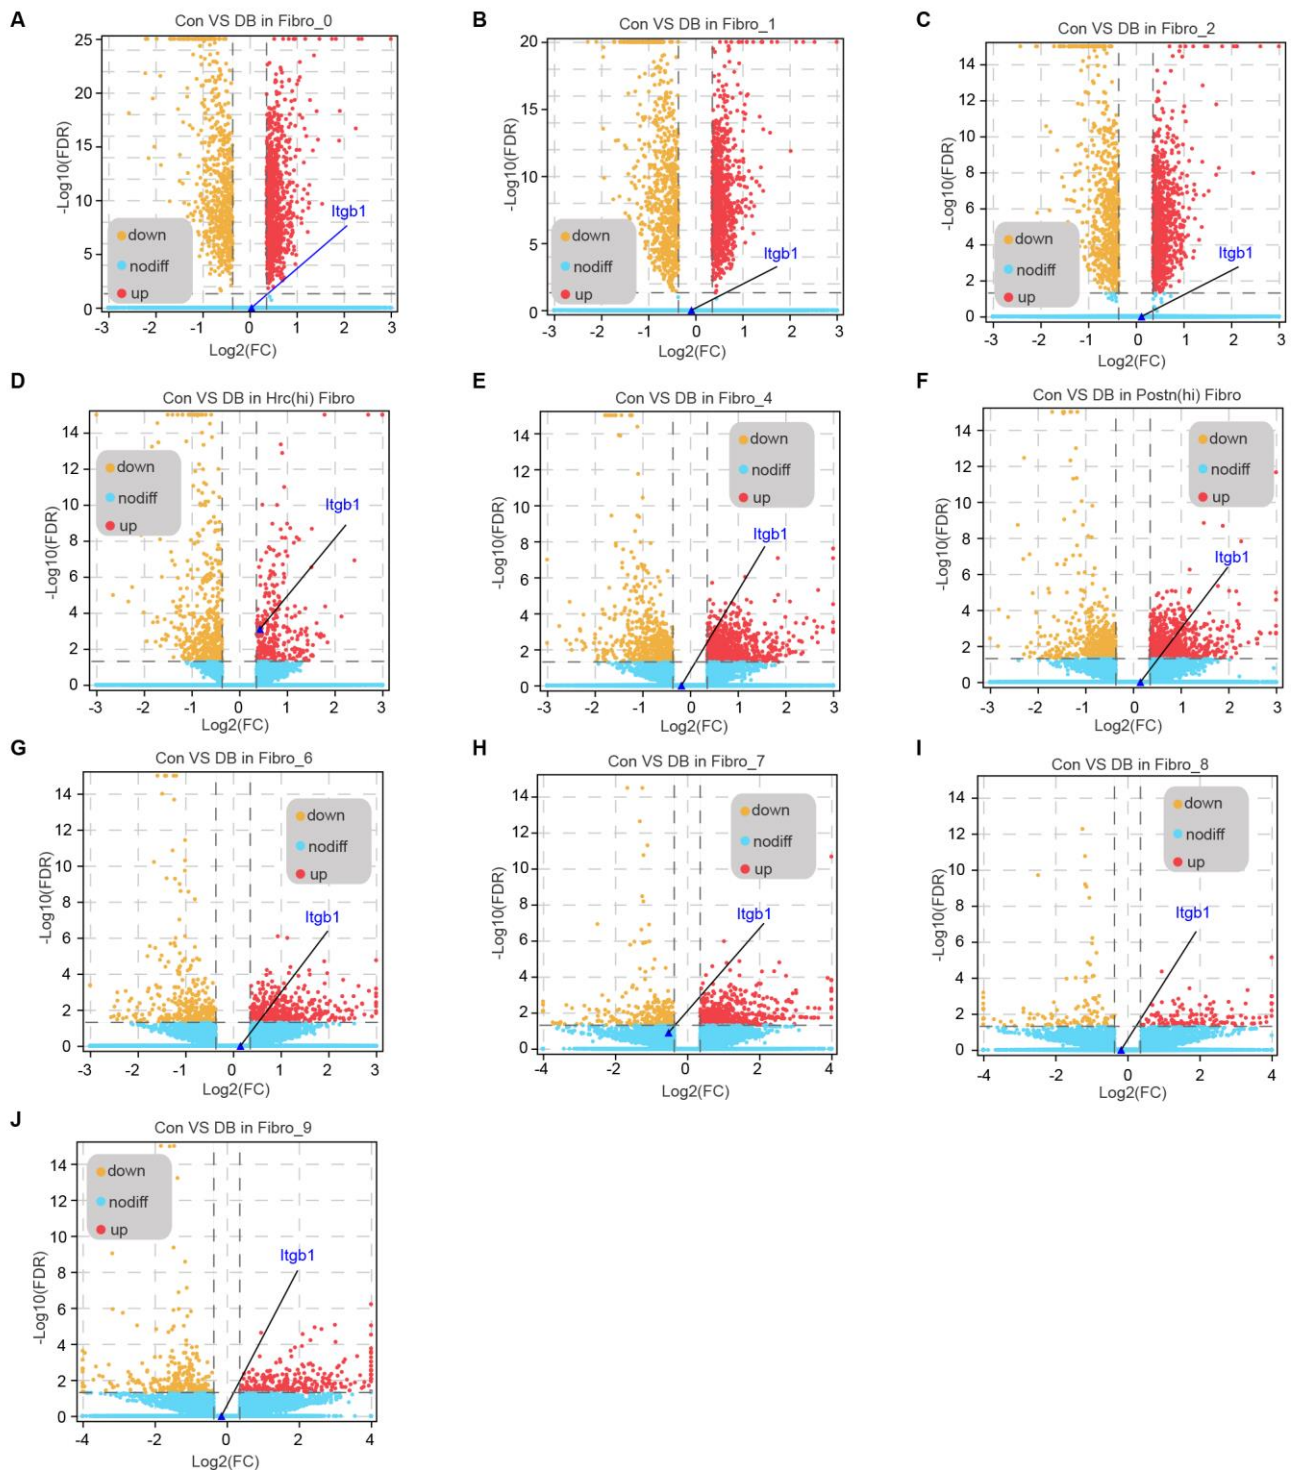

663 **Figure 6-Figure supplement 2.** Volcano plots shows DEGs in each cardiac fibroblast  
664 subpopulation from HFD/STZ-treated or control mice with *Itgb1* highlighted (2-sided  
665 Wilcoxon rank-sum test,  $\text{FDR} \leq 0.05$ ,  $\text{log}_2\text{FC} \geq 0.36$ ).

666 **Identification of SNPs of Itgb1 and Fn1 correlated with type 2 diabetes and**  
667 **glucose metabolic disorders**

668 To investigate the clinical relevance of Itgb1 to type 2 diabetes and glucose metabolic  
669 disorders, we examined the gene polymorphism of Itgb1 in human subjects. We  
670 searched single nucleotide polymorphism (SNP) located in Itgb1 and its ligands, Fn1  
671 and Lgals3bp, in GWAS CENTRAL (<https://www.gwascentral.org/>) and found  
672 dozens of SNPs correlated with type 2 diabetes and blood glucose parameters. As  
673 summarized in table 1, three SNPs, rs2230394, rs2230395, and rs16933819 located on  
674 Itgb1 are correlated with type 2 diabetes. Among them rs2230395 causes termination  
675 of translation (Tyr153=Y(Tyr)> \*(Ter)) and rs2230395 results in synonymous variant  
676 of protein. Four SNP loci of Fn1 are correlated with type 2 diabetes, among them  
677 rs13652 causes termination of translation (1575Asp=E(Glu)>D(Asp)). Although other  
678 SNPs of Itgb1 and Fn1 correlated with type II diabetes cause intron variant and do not  
679 affect amino acids, they all have significant correlation with type 2 diabetes (P<0.05).  
680 There are no Lgals3ps SNP loci significantly correlated with type 2 diabetes (Table  
681 1).

682 SNPs of Itgb1 and Fn1 are also correlated with other blood glucose parameters. Eight  
683 SNP loci of Fn1 are associated with fasting glucose-related: homeostatic model  
684 assessment of beta-cell function, among them rs13652 causes missense variant of Fn1  
685 (1575Asp=E(Glu)>D(Asp)) (P=0.01951). Four SNPs of Itgb1 are associated with  
686 fasting insulin-related: fasting insulin (P<0.05). Three SNPs of Fn1 are associated  
687 with fasting glucose-related: fasting plasma glucose (P<0.05) (Table 1). Together,  
688 these GWAS data supported the role of Fn1-Itgb1 pair in type 2 diabetes.

689

690

691

692

693

694

695

696

697 **Table 1. SNPs of Itgb1 and Fn1 correlated with type 2 diabetes and glucose**

698 **metabolic disorders**

| <b>Correlations with type II diabetes</b>                                |       |         |             |                             |                    |                                              |                    |
|--------------------------------------------------------------------------|-------|---------|-------------|-----------------------------|--------------------|----------------------------------------------|--------------------|
| SNP                                                                      | Gene  | p-value | Alleles     | Position                    | Consequence        | Amino acid                                   | Dataset identifier |
| rs2230394                                                                | Itgb1 | 0.02823 | G>A,C       | chr10:32928182 (GRCh38)     | Stop Gained        | NP_002202.2:p. Tyr153Ter<br>Y (Tyr) > *(Ter) | HGVRS9             |
| rs2230395                                                                | Itgb1 | 0.03615 | T>A,G       | chr10:32922299 (GRCh38)     | Synonymous Variant | NP_002202.2:p. Ala362=<br>A(Ala) > A (Ala)   | HGVRS9             |
| rs16933819                                                               | Itgb1 | 0.0498  | T>C         | chr10:32922299 (GRCh38)     | Intron variant     |                                              | HGVRS9             |
| rs13652                                                                  | Fn1   | 0.01    | C>A,T       | chr2:215384864 (GRCh38)     | Missense Variant   | NP_997647.2:p. Glu1575Asp<br>E(Glu) > D(Asp) | HGVRS16            |
| rs1968510                                                                | Fn1   | 0.047   | A>C,G,<br>T | chr2:215393528 (GRCh38)     | Intron variant     |                                              | HGVRS16            |
| rs2372544                                                                | Fn1   | 0.031   | G>A,C,<br>T | chr2:215399547 (GRCh38)     | Intron variant     |                                              | HGVRS16            |
| rs6744921                                                                | Fn1   | 0.036   | A>G         | chr2:215402013 (GRCh38)     | Intron variant     |                                              | HGVRS16            |
| <b>Correlations with fasting insulin-related: fasting insulin</b>        |       |         |             |                             |                    |                                              |                    |
| SNP                                                                      | Gene  | p-value | Alleles     | Position                    | Consequence        | Amino acid                                   | Dataset identifier |
| rs2245844                                                                | Itgb1 | 0.04343 | C>A,T       | chr10:32935848 (GRCh38.p13) | Intron Variant     |                                              | HGVRS3266          |
| rs2488329                                                                | Itgb1 | 0.04549 | A>C,G,<br>T | chr10:32926545 (GRCh38.p13) | Intron Variant     |                                              | HGVRS3266          |
| rs2503995                                                                | Itgb1 | 0.04766 | G>A,C       | chr10:32924543 (GRCh38.p13) | Intron Variant     |                                              | HGVRS3266          |
| rs2503996                                                                | Itgb1 | 0.04557 | C>T         | chr10:32924909 (GRCh38.p13) | Intron Variant     |                                              | HGVRS3266          |
| <b>Correlations with fasting glucose-related: fasting plasma glucose</b> |       |         |             |                             |                    |                                              |                    |

|                                                                                                      |     |          |             |                                |                     |                                                 |           |
|------------------------------------------------------------------------------------------------------|-----|----------|-------------|--------------------------------|---------------------|-------------------------------------------------|-----------|
| rs11883812                                                                                           | Fn1 | 0.03278  | T>C         | chr2:215392258<br>(GRCh38.p13) | Intron<br>Variant   |                                                 | HGVRS3269 |
| rs17516906                                                                                           | Fn1 | 0.0473   | A>G         | chr2:215414550<br>(GRCh38.p13) | Intron<br>Variant   |                                                 | HGVRS3269 |
| rs17517928                                                                                           | Fn1 | 0.03306  | C>T         | chr2:215426636                 | Intron<br>Variant   |                                                 | HGVRS3269 |
| <b>Correlations with Fasting glucose-related: homeostatic model assessment of beta-cell function</b> |     |          |             |                                |                     |                                                 |           |
| rs1250201                                                                                            | Fn1 | 0.0452   | C>A,G,<br>T | chr2:215385096<br>(GRCh38)     | Intron Variant      |                                                 | HGVRS3267 |
| rs1250203                                                                                            | Fn1 | 0.01508  | G>C,T       | chr2:215383582<br>(GRCh38.p13) | Intron Variant      |                                                 | HGVRS3267 |
| rs13652                                                                                              | Fn1 | 0.01951  | C>A,T       | chr2:215384864                 | Missense<br>Variant | NP_997647.2:p.<br>Glu1575Asp<br>E (Glu) >D(Asp) | HGVRS3267 |
| rs1968509                                                                                            | Fn1 | 0.03908  | C>G,T       | chr2:215390542<br>(GRCh38.p13) | Intron Variant      |                                                 | HGVRS3267 |
| rs1968510                                                                                            | Fn1 | 0.007892 | A>C,G,<br>T | chr2:215393528<br>(GRCh38.p13) | Intron Variant      |                                                 | HGVRS3267 |
| rs2577302                                                                                            | Fn1 | 0.0278   | T>A,C,<br>G | chr2:215392542<br>(GRCh38.p13) | Intron Variant      |                                                 | HGVRS3267 |
| rs2692230                                                                                            | Fn1 | 0.0227   | C>A,G,<br>T | chr2:215392624<br>(GRCh38.p13) | Intron Variant      |                                                 | HGVRS3267 |
| rs6435904                                                                                            | Fn1 | 0.04018  | T>A,C,<br>G | chr2:215389839<br>(GRCh38.p13) | Intron<br>Variant   |                                                 | HGVRS3267 |

699

700

701

702

703

704

705

706

707

## 708 **Discussion**

709 scRNA-seq allows in-depth analysis of the individual cells in heterogenous  
710 populations (*Butler et al., 2018*) of healthy and diseased tissues (*Mathys et al., 2019*;  
711 *Peng et al., 2019*; *Kalucka et al., 2020*; *Litviňuková et al., 2020*; *Li et al., 2021*).

712 However, the effect of diabetes on cardiac cell function and cardiac cell heterogeneity  
713 at single-cell level has not been reported so far. In this study, we mapped the  
714 transcriptional alterations associated with HFD/STZ-induced diabetes in different  
715 cardiac cell populations, and identified the key ligand-receptor pair drivers of  
716 myocardial fibrosis in fibroblasts of diabetic heart. Specifically, the emergence of  
717 Hrc<sup>hi</sup> fibroblast subpopulations in response to diabetic progression, presumably to  
718 remodel the extracellular environment by multiple ligand-receptor interactions.

719 The heart of a mammal is a complex organ composed of a variety of cell types  
720 (*Banerjee et al., 2007*; *Litviňuková et al., 2020*). Cardiac fibroblasts synthesize  
721 extracellular matrix proteins and their excessive activation in response to stress  
722 induces cardiac fibrosis (*Travers et al., 2016*). GO enrichment analysis of all  
723 upregulated genes in cardiac cell populations from the diabetic mice confirmed the  
724 association between fibroblasts and extracellular matrix remodeling and myocardial  
725 fibrosis, which is consistent with previous studies (*Jia et al., 2018*; *Ivey et al., 2019*;  
726 *McLellan et al., 2020*; *Frangogiannis, 2021*). The survival and proper functioning of  
727 metazoans depends on the communication between multiple cell populations and  
728 tissues via secretory ligands and membrane receptors (*Ramilowski et al., 2015*). To  
729 this end, we screened for the receptor genes that were highly expressed in cardiac  
730 fibroblasts of diabetic mice and their cognate ligands that were upregulated in other  
731 cardiac cell populations to identify the dysregulated ligand-fibroblast receptor  
732 interactions. Protein-protein interaction network analysis indicated that the receptors  
733 Pdgfra and Egfr, which are highly expressed in fibroblasts, play central roles in  
734 myocardial fibrosis of diabetes. Pdgfra is a surface receptor tyrosine kinase that is  
735 activated upon binding to its corresponding ligand Pdgf(s), and regulates cell division  
736 and proliferation (*Rudat et al., 2013*; *Gouveia et al., 2018*; *Soliman et al., 2020*). Egfr  
737 on the other hand is a member of the ErbB family of receptor tyrosine kinases and



738 plays an important role in wound healing and cardiac hypertrophy (*Peng et al., 2016*).  
739 The upregulation of Pdgfra ligands Pdgfb and Pdgfd in endothelial cells, and Pdgfc in  
740 macrophages, and that of the Egfr ligand Efemp1 in epicardial cells of the  
741 HFD/STZ-treated mice indicated that the cardiac microenvironment was changed,  
742 resulting in extracellular matrix remodeling and cardiac fibrosis. This is of particular  
743 interest given the pathological roles of these cell populations and ligand-receptor pairs  
744 in cardiovascular diseases (*Rottlaender et al., 2011; Shinagawa and Frantz, 2015;*  
745 *Farbehi et al., 2019; Marín-Juez et al., 2019; Peet et al., 2020; Baguma-Nibasheka et*  
746 *al., 2021*). Ligand-receptor pair analysis also revealed a synergistic role of endothelial  
747 cells, macrophages and epicardial cells with the fibroblasts in diabetic myocardial  
748 fibrosis. Further analysis of the interactions between these cell populations will help  
749 understand the pathogenesis of diabetes-induced fibrosis.

750 Terminally differentiated cells are generally considered to have limited plasticity.  
751 Most cellular plasticity in adults is reported in the terminal differentiation stage of  
752 many progenitor cells (*Chang-Panesso and Humphreys, 2017*). However, these  
753 cellular transitions also may be present in cardiac fibroblasts. Unbiased single-cell  
754 clustering can redefine cell types on basis of the global transcriptome patterns  
755 (*Rozenblatt-Rosen et al., 2017; McLellan et al., 2020*). Such analyses have already  
756 been applied to other organs (*Macosko et al., 2015; Chen et al., 2017; Stubbington et*  
757 *al., 2017*) and even to whole multicellular organisms (*Cao et al., 2017; Karaïskos et*  
758 *al., 2017*). These experiments have identified new cells as well as previously defined  
759 cells with catalogued marker genes, demonstrating that this approach has the ability to  
760 redefine cardiac cell types. One of the most important results of mouse cardiac  
761 fibroblasts analysis was the identification of two different phenotypic Hrc<sup>hi</sup> and  
762 Postn<sup>hi</sup> fibroblast subpopulations that were associated with extracellular matrix  
763 remodeling. The Postn<sup>hi</sup> fibroblasts participate in fibrogenic progression, which is  
764 consistent with another subpopulation of fibroblasts identified in an animal model of  
765 angiotensin-induced myocardial hypertrophy (*McLellan et al., 2020*), suggesting that  
766 these fibroblasts may contribute to both myocardial hypertrophy and cardiac fibrosis.  
767 Hrc<sup>hi</sup> fibroblasts expressed fibrogenic marker genes such as Nppa, Ttn and Clu, which

768 points to a key pro-fibrotic function. Hrc knockout or AAV mediated knockdown  
769 result in pulmonary edema, severe cardiac hypertrophy, fibrosis, heart failure and  
770 decreased survival after transverse aortic constriction (TAC) in mice (*Park et al.,*  
771 *2012, 2013*). Combined with our single cell sequencing results, we can surmise that  
772 Hrc is a potential target for inhibiting myocardial fibrosis during diabetes.

773 Strikingly, GSVA and GO analyses of each fibroblast subpopulation indicated that  
774 Hrc<sup>hi</sup> fibroblasts were the most profibrogenic under diabetic conditions. This finding  
775 suggests that the Hrc<sup>hi</sup> fibroblasts may be the key cellular drivers of myocardial  
776 fibrosis in diabetes. We speculate that the intercellular communications between Hrc<sup>hi</sup>  
777 fibroblasts and other cardiac cells are a constitutive process that is activated in  
778 diabetes. Intercellular and protein-protein interaction networks within the Hrc<sup>hi</sup>  
779 fibroblasts reveal the key role of receptor Itgb1 in diabetic myocardial fibrosis. And  
780 the potential ligands of Itgb1, Lgals3bp and Fn1, are upregulated in the heart tissues  
781 of diabetic mice. Perhaps, the gain-of-function of Lgals3bp-Itgb1 and Fn1-Itgb1 pairs  
782 explains the role of Hrc<sup>hi</sup> fibroblasts in diabetic myocardial fibrosis.

783 To explore the clinical significance of the role of Itgb1 in type 2 diabetes, we searched  
784 GWAS database and identified dozens of SNPs located on Itgb1 that are correlated  
785 with type 2 diabetes and other blood glucose parameters in human population.  
786 Although most SNPs identified are non-coding and only cause intron variant, they  
787 may regulate gene expression via modification of promoter and enhancer activity or  
788 disruption of binding sites for transcription factors (*Cano-Gamez and Trynka, 2020*).  
789 Besides Itgb1, we also identified several SNPs located on Fn1 correlated with type 2  
790 diabetes and other blood glucose parameters, while we only verified the role of Itgb1  
791 in myocardial fibrosis of diabetes. The GWAS data supported the role of Itgb1 and  
792 Fn1 in type 2 diabetes in human population. Whole exon sequencing and other  
793 bioinformatic tools may help to identify additional amino acid variants of Itgb1 and  
794 its ligands in type 2 diabetes and related diseases.

795 In summary, we mapped the transcriptional alterations associated with  
796 HFD/STZ-induced diabetes in different cardiac subpopulations, and identified the key  
797 ligand-receptor pair drivers of myocardial fibrosis in diabetic heart, specifically the

798 Pdgf(s)-Pdgfra and Efemp1-Egfr interaction mediated by fibroblasts with  
799 macrophages, endothelial cells and epicardial cells respectively. Crucially, Hrc<sup>hi</sup>  
800 fibroblasts were identified as the key profibrogenic subpopulation that may contribute  
801 to cardiac fibrosis by remodeling the extracellular environment through the drivers of  
802 intercellular communication mediated by Itgb1. Therefore, we speculate that specific  
803 targeting Hrc<sup>hi</sup> fibroblasts will be a promising target for the treatment of myocardial  
804 fibrosis. Our future research direction will entail combining fibroblast-specific Hrc  
805 knockout mice and analysis of the cardiac cellular networks to verify the role of Hrc  
806 in regulating diabetic myocardial fibrosis.

807

## 808 **Materials and methods**

### 809 **Animals and treatments**

810 Male C57BL/6J mice weighing 18-22 g at 6 weeks old were purchased from the  
811 Center for Laboratory Animals, Soochow University. After 1 week of acclimatization,  
812 diabetic mouse model was prepared as described previously with some modifications  
813 (*Lu et al., 2011; Li et al., 2017*). The mice in normal group were fed with normal diet,  
814 and all the mice of other groups were fed with HFD (60% fat, 20% protein and 20%  
815 carbohydrate) during all the animal experiment. After 6 weeks of HFD feeding, the  
816 mice in the diabetic control model and imatinib group were fasted for 12 hours every  
817 night and injected with STZ (35 mg/kg, dissolved at 0.1 mM cold citrate buffer, pH  
818 4.4) for 3 days to induce diabetes. Meanwhile, the control group was injected with  
819 citrate buffer. After a week of STZ injection, 12 h fasting glucose levels of all mice  
820 was measured. Mice with fasting blood glucose levels  $\geq 11.1$ mmol/L (*Yu et al., 2014*)  
821 were considered as type 2 diabetes mice. Then, imatinib (40 mg/kg) was administered  
822 by intraperitoneal injection daily during the procedure. After 21 weeks injection of  
823 STZ, the mice were anesthetized with intraperitoneal injection of pentobarbital  
824 sodium. The hearts were dissected and stored at -80 °C for further analysis. During the  
825 experiment, mice were kept on their respective diets and their body weight was  
826 measured weekly. All procedures were performed with minimal damage to the mice.

827

828 **Immunofluorescence**

829 After fixed in 4 % PFA and dehydrated with 20% sucrose, hearts were embedded in  
830 optimal cutting temperature (OCT) compound and stored at -80 °C. They were then  
831 sectioned by Leica CM1950 into 10µm-thick horizontal slices. The sections were  
832 incubated with primary antibody (anti-CD68 (Abcam, ab955), anti-CD31 (Abcam,  
833 ab28364), anti-CD31 (BD, 553700), anti-Pdgfb (CST, 3169T), anti-Pdgfc (Abcam,  
834 ab200401), anti-Pdgfd (Abcam, ab234666), anti-Pdgfra (R&D, AF1062-SP),  
835 anti-phospho-Pdgfra (Tyr754) (Thermo Fisher, 441008G), anti-Vim (R&D,  
836 BAM2105), anti-Hrc (Proteintech, 18142-1-AP), anti-Postn (R&D, AF2955-SP),  
837 anti-Itgb1 (Invitrogen, 14-0299-82), anti-FN1 (Abcam, ab2413), and anti-Lgals3bp  
838 (Abcam, ab236509)) or an IgG control for immunofluorescence staining. The  
839 fluorescent secondary antibodies (goat anti mouse IgM Alexa Fluor® 647, abcam,  
840 ab150123, or donkey anti rabbit IgG Alexa Fluor® 568, abcam, ab175470) and DAPI  
841 (SouthernBiotech, 0100-01) were used to visualize specific proteins.

842 **Real-time quantitative polymerase chain reaction (RT-qPCR)**

843 Total RNA from mouse hearts was extracted using QIAGEN's miRNeasy Mini kit  
844 (217004; Qiagen, Germany). The reverse transcription step was performed using  
845 Takara's PrimeScript™ RT Master Mix (RR036A; Takara, Japan). A brilliant SYBR  
846 green PCR master mix (4913914, Roche, Switzerland) was used to perform qPCR on  
847 cDNA templates in a LightCycler 480 (Roche, Switzerland). The target mRNA  
848 expression levels were normalized to that of GAPDH and the relative fold change was  
849 calculated using the  $2^{-\Delta\Delta CT}$  method. The qPCR primers for collagen I (forward 5'-  
850 AACTCCCTCCACCCAATCT, reverse 5'-CCATGGAGATGCCAGATGGTT),  
851 collagen III (forward 5'-ACGTAAGCACTGGTGGACAG, reverse 5'-  
852 GGAGGGCCATAGCTGAACTG), Itgb1 (forward 5'-ATGCCAAATCTTGCGGAG  
853 AAT, reverse 5'-TTTGCTGCGATTGGTGACATT), and GAPDH (forward 5'-  
854 GGTCATCCATGACAACCTT, reverse 5'-GGGGCCATCCACAGTCTT) are  
855 designed and synthesized by Invitrogen (Shanghai, China).

856 **siRNA-mediated knockdown of Itgb1 in mice heart**

857 The siRNAs targeting *Itgb1* were used as previously reported (*Speicher et al., 2014*).  
858 Sense 5'-AGAuGAGGuucAAuuuGAAdTsdT, antisense 5'-UUcAAAUUGAACCUcA  
859 UCuDTsdT. Negative control: sense 5'-cuuAcGcuGAGuAcuucGAdTsdT, antisense  
860 5'-UCGAAGuACUcAGCGuAAGdTsdT. These targeted siRNA sequences were  
861 subcloned into an AAV9 plasmid vector and packaged into AAV virus particle in  
862 vitro, and the titers of AAV viruses were ensured to exceed the  $1 \times 10^{12}$  vg/ml. Diabetic  
863 C57BL/6 male mice received negative control or *Itgb1* siRNA mediated by AAV (0.5  
864 mg/kg) via tail vein injection in a volume of 5 ml/kg body weight on the day 1 and 5  
865 after the first STZ injection. At day 10 and month 5, the knockdown efficiency of  
866 *Itgb1* was determined in the mice heart.

#### 867 **Isolation of nuclei from heart tissue**

868 Isolation of nuclei from heart tissue were analyzed as previously described (*McLellan*  
869 *et al., 2020*). Briefly, mouse heart tissues were homogenized using a Wheaton Dounce  
870 Tissue Grinder. 3 ml of homogenization buffer was added and the homogenized tissue  
871 was incubated on ice for 5 minutes. Then the homogenized tissue was filtered through  
872 a through 40 mm cell strainer, mixed with an equal volume of working solution and  
873 loaded on top of an OptiPrep density gradient on top of 5 ml 35% OptiPrep solution.  
874 The nuclei were separated by ultracentrifugation using an SW32 rotor (20 minutes,  
875 9000 rpm). 3 ml of nuclei were collected from the 29%/35% interphase and washed  
876 with 30 ml of PBS containing 0.04% BSA. The nuclei were centrifuged at 300 g for 3  
877 minutes and washed with 20 ml of PBS containing 0.04% BSA. Then the nuclei were  
878 centrifuged at 300 g for 3 minutes and re-suspended in 500 microliter PBS containing  
879 0.04% BSA. All procedures were carried out on ice or at 4 °C.

#### 880 **Single-nucleus transcriptomic library preparation**

881 Single-nucleus transcriptomic library preparation were performed as previously  
882 described (*Li et al., 2021*). Briefly, single nucleus was resuspended in PBS with  
883 0.04% BSA and added to each channel. The captured nucleus was lysed, and the  
884 released RNA was barcoded through reverse transcription in individual GEMs.  
885 Barcoded cDNA was amplified, and the quality was controlled using Agilent 4200  
886 TapeStation System. scRNA-seq libraries were prepared using Single Cell 3' Library

887 and Gel Bead Kit V3 following the manufacture's introduction. Sequencing was  
888 performed on an Illumina Novaseq 6000 sequencer with a pair-end 150 bp (PE150)  
889 reading strategy (performed by Gene Denovo Biotechnology Co., Guangzhou, China).

### 890 **Clustering analysis**

891 Alignment, filtering, barcode counting, and UMI counting were performed with Cell  
892 Ranger to generate a feature-barcode matrix and their global gene expressions.  
893 Dimensionality reduction, visualization, and analysis of scRNA-sequencing data were  
894 performed with the R package Seurat (version 3.1.2). As a further quality-control  
895 measure, nucleus meeting any of the following criteria were filtered out: <500  
896 or >4,000 unique genes expressed, >8,000 UMIs, or >10% of reads mapping to  
897 mitochondria. After removing unwanted nucleus from the dataset, two thousand  
898 highly variable genes were used for downstream clustering analysis. Principal  
899 Component Analysis (PCA) was performed, and the number of the significant  
900 principal components was calculated using the built-in "ElbowPlot" function.

### 901 **Differentially expressed genes analysis**

902 Expression level of each gene in target cluster were compared against the rest of cells  
903 using Wilcoxon rank sum test. Significant upregulated genes were identified using the  
904 following criteria: (i) at least 1.28-fold overexpressed in the target cluster, (ii)  
905 expressed in more than 25% of the cells belonging to the target cluster, and (iii) FDR  
906 is less than 0.05.

### 907 **Gene Set Variation Analysis**

908 To identify cellular processes and pathways enriched in different clusters, Gene Set  
909 Variation Analysis (GSVA) was performed in the GSVA R package (*Hänzelmann et*  
910 *al., 2013*) version 1.26 based on the cluster-averaged log-transformed expression  
911 matrix.

### 912 **Differentially expressed genes Gene Ontology and Kyoto Encyclopedia of Genes** 913 **and Genomes pathway enrichment analysis**

914 Gene Ontology (GO) and Kyoto Encyclopedia of Genes and Genomes (KEGG)  
915 pathway enrichment analysis identified significantly enriched cellular processes and  
916 pathways in differentially expressed genes comparing with the whole genome

917 background. The calculated p-value was gone through FDR Correction, taking FDR  
918  $\leq 0.05$  as a threshold. GO term and KEGG pathways meeting this condition were  
919 defined as significantly enriched pathways in differentially expressed genes.

### 920 **Regulon analysis**

921 Regulon analysis was performed on the SCENIC R package to carry out transcription  
922 factor network inference (*Aibar et al., 2017*). In brief, gene expression matrix was  
923 used as input, and the pipeline was implanted in three steps. First, gene co-expression  
924 network was identified via GENIE3 (*Huynh-Thu et al., 2010*). Second, we pruned  
925 each module based on a regulatory motif near a transcription start site via RcisTarget.  
926 Third, we scored the activity of each regulon for each single cell via the AUC scores  
927 using AUCCell R package.

928

### 929 **Statistical analyses**

930 The statistical analysis of the results was performed using GraphPad Prism 9.0  
931 software. Unpaired t test or one-way ANOVA analysis were used to calculate the  
932 differences in mean values.  $P \leq 0.05$  was considered statistically significant. Other  
933 statistical analyses not described above were performed using the ggpubr package in  
934 R (<https://github.com/kassambara/ggpubr>).

### 935 **Acknowledgments**

936 We thank Guangzhou Gene Denovo Biotechnology Co. (Guangzhou, China) for the  
937 technical support in single cell RNA sequencing of normal and T2DM mouse heart,  
938 and thank Professor Huiling Zhang's team of College of Pharmaceutical Science in  
939 Soochow University for their friendly help in the experimental process of diabetic  
940 myocardial fibrosis in mice. Thanks to the public research platform of Soochow  
941 University for their technical support of this experiment. We also thanks to the native  
942 English speaker from CureEdit to improve the grammar and readability.

943

---

### 944 **Additional information**

### 945 **Funding**

| 946 | <b>Funder</b>                    | <b>Grant reference number</b> | <b>Author</b> |
|-----|----------------------------------|-------------------------------|---------------|
| 947 | Suzhou Science                   | SKJY 2021038                  | Shigang Qiao  |
| 948 | and Technology                   |                               |               |
| 949 | Development Plan                 |                               |               |
| 950 |                                  |                               |               |
| 951 | Jiangsu Key Talent Youth         |                               |               |
| 952 | Awards In Medicine               | QNRC2016219                   | Shigang Qiao  |
| 953 |                                  |                               |               |
| 954 | Gusu Health Youth                |                               |               |
| 955 | Talent Awards                    | GSWS2019092                   | Shigang Qiao  |
| 956 |                                  |                               |               |
| 957 | Gusu Health                      |                               |               |
| 958 | Talent Program                   | GSWS2021068                   | Zhenhao Zhang |
| 959 |                                  |                               |               |
| 960 | Suzhou New District Science      |                               |               |
| 961 | and Technology Project           | 2020Z007                      | Zhenhao Zhang |
| 962 |                                  |                               |               |
| 963 | General Program of Basic Science | 21KJB350017                   | Shudi Yang    |
| 964 | in Jiangsu Higher                |                               |               |
| 965 | Education Institutions           |                               |               |
| 966 |                                  |                               |               |
| 967 | the Core Medical Science         | SZ XK202131                   | Shudi Yang    |
| 968 | Subjects in Suzhou               |                               |               |
| 969 |                                  |                               |               |

#### 970 **Author Contributions**

971 Wei Li, Conceptualization, Data curation, Formal analysis, Methodology,  
972 Investigation, Writing - original draft, Writing - review and editing; Xinqi Lou,  
973 Yingjie Zha, Jun Zha, Lei Hong, Shudi Yang and Zhanli Xie, Formal analysis,  
974 Investigation; Chen Wang, Conceptualization; Jianzhong An, Conceptualization,  
975 Guidance; Zhenhao Zhang, Conceptualization, Funding acquisition, Writing - original  
976 draft, Writing - review and editing; Shigang Qiao, Conceptualization, Funding  
977 acquisition, Supervision, Writing - original draft, Writing - review and editing.

#### 978 **Author ORCIDs**

979 Zhenhao Zhang <https://orcid.org/0000-0001-5659-6315>

980 Shigang Qiao <https://orcid.org/0000-0003-0309-8405>

#### 981 **Ethics**

982 Our present study was approved by the ethics committee of Soochow University and



983 Suzhou Science & Technology Town Hospital, Gusu School, Nanjing Medical  
984 University. All mouse were treated in accordance with the National Institutes of  
985 Health's Guidelines for the Care and Use of Experimental Animals (NIH publications  
986 No. 80-23, revised 1996).

987

988 **Additional Files**

989 Supplementary files

990 Supplementary file 1: 25 transcriptionally distinct pre-clusters with highly consistent  
991 expression patterns across individual mouse heart.

992 Supplementary file 2: Genes of significant transcriptomic changes in cardiac  
993 populations.

994 Supplementary file 3: The top 10 upregulated genes in cardiac populations.

995 Supplementary file 4: unique differentially-expressed genes (uni-DEGs) in cardiac  
996 populations.

997 Supplementary file 5: Significantly differentially-expressed genes in specific cell  
998 populations relative to others in mouse heart.

999 Supplementary file 6: Cell type-specific receptors in cardiac populations.

1000 Supplementary file 7: Cell type-specific ligands in cardiac populations.

1001 Supplementary file 8: Relative expression of a selection of essential growth factors  
1002 across major cardiac cell types.

1003 Supplementary file 9: The number of ligand-receptor pairs between cardiac cell  
1004 populations in healthy mice.

1005 Supplementary file 10: Ligand-receptor pairs between cardiac cell populations in  
1006 healthy mice.

1007 Supplementary file 11: Significant differentially-expressed ligands for each cell  
1008 population.

1009 Supplementary file 12: Significant differentially-expressed receptors for each cell  
1010 population.

1011 Supplementary file 13: The cognate ligands of Egfr.

1012 Supplementary file 14: The cognate ligands of Pdgfra.

1013 Supplementary file 15: 10 transcriptionally distinct fibroblast subpopulations.  
1014 Supplementary file 16: Distinct signatures of each fibroblast subpopulations in heart.  
1015 Supplementary file 17: The transcription-factor gene-regulatory networks in the  
1016 distinct subpopulations.  
1017 Supplementary file 18: Gene-expression of transcription factors in Figure 5A and B.  
1018 Supplementary file 19: Genes of significant transcriptomic changes in each fibroblast  
1019 subpopulation.  
1020 Supplementary file 20: unique differentially-expressed genes (uni-DEGs) in each  
1021 fibroblast subpopulation.  
1022 Supplementary file 21: The cognate ligands of *Itgb1*.  
1023 Transparent reporting form

#### 1024 **Data availability**

1025 All sequencing data that support this study is available at Genome Sequence Archive  
1026 in BIG Data Center (<http://bigd.big.ac.cn/>) with the accession code CRA007245.  
1027 Ligand and receptor pairing dataset was obtained from Fantom5  
1028 ([https://fantom.gsc.riken.jp/5/suppl/Ramilowski\\_et\\_al\\_2015/](https://fantom.gsc.riken.jp/5/suppl/Ramilowski_et_al_2015/)), as recently described  
1029 (Ramilowski et al., 2015). SNPs of *Itgb1* and *Fn1* correlated with type 2 diabetes and  
1030 glucose metabolic disorders generated in this study was obtained from GWAS  
1031 CENTRAL (<https://www.gwascentral.org/>). Source data files are provided to support  
1032 CT values of Collagen I and Collagen III used for Figure 3G-H. Source data files are  
1033 provided to support CT values of *Itgb1* used for Figure 6H.

1034 The following dataset was generated:

| 1035 Author(s)                    | Year | Dataset title            | Dateset URL                                                | Database and Identifier |
|-----------------------------------|------|--------------------------|------------------------------------------------------------|-------------------------|
| 1036 Wei Li, Xinqi Lou,           | 2022 | Single cell Profiling of | <a href="https://ngdc.cncb">https://ngdc.cncb</a>          | CNCB Genome Sequence    |
| 1037 Yinjie Zha, Jun Zha,         |      | Diabetic Mouse Heart     | <a href="https://ngdc.cncb.ac.cn/gsa/s/">.ac.cn/gsa/s/</a> | Archive, CRA007245      |
| 1038 Lei Hong, Zhanli Xie,        |      |                          | dm1U3NdM                                                   |                         |
| 1039 Shudi Yang, Chen Wang,       |      |                          |                                                            |                         |
| 1040 Jianzhong An, Zhenhao Zhang, |      |                          |                                                            |                         |
| 1041 Shigang Qiao                 |      |                          |                                                            |                         |
| 1042                              |      |                          |                                                            |                         |
| 1043                              |      |                          |                                                            |                         |

1044 The following previously published dataset was used:

| 1045 Author(s) | Year | Dataset title | Dateset URL | Database and Identifier |
|----------------|------|---------------|-------------|-------------------------|
|----------------|------|---------------|-------------|-------------------------|

1046

---

1047 Ramilowski JA, Goldberg T, 2015 A draft network of <https://fantom.> Fantom5, N/A  
1048 Harshbarger J, Kloppman E, ligand-receptor mediated [gsc.riken.jp/5/suppl/](https://gsc.riken.jp/5/suppl/)  
1049 Lizio M, Satagopam VP, multicellular signaling [Ramilowski\\_et\\_al\\_2015/](https://ramilowski-et-al-2015/)  
1050 Itoh M, Kawaji H, in human  
1051 Carninci P, Rost B,  
1052 Forrest ARR  
1053

---

1054

## 1055 **References**

1056

1057 Aibar S, González-Blas CB, Moerman T, Huynh-Thu VA, Imrichova H, Hulselmans G, Rambow F, Marine JC,  
1058 Geurts P, Aerts J, van den Oord J, Atak ZK, Wouters J, Aerts S. 2017. SCENIC: single-cell regulatory  
1059 network inference and clustering. *Nature methods* **14**:1083-1086. doi: 10.1038/nmeth.4463, PMID:  
1060 28991892  
1061 Bach LA. 2015. Endothelial cells and the IGF system. *Journal of molecular endocrinology* **54**:R1-13. doi:  
1062 10.1530/JME-14-0215, PMID: 25351818  
1063 Baguma-Nibasheka M, Feridooni T, Zhang F, Pasumarthi K. 2021. Regulation of Transplanted Cell Homing by  
1064 FGF1 and PDGFB after Doxorubicin Myocardial Injury. *Cells* **10**. doi: 10.3390/cells10112998, PMID:  
1065 34831221  
1066 Banerjee I, Fuseler JW, Price RL, Borg TK, Baudino TA. 2007. Determination of cell types and numbers during  
1067 cardiac development in the neonatal and adult rat and mouse. *American journal of physiology. Heart and*  
1068 *circulatory physiology* **293**:H1883-1891. doi: 10.1152/ajpheart.00514.2007, PMID: 17604329  
1069 Butler A, Hoffman P, Smibert P, Papalexi E, Satija R. 2018. Integrating single-cell transcriptomic data across  
1070 different conditions, technologies, and species. *Nature biotechnology* **36**:411-420. doi: 10.1038/nbt.4096,  
1071 PMID: 29608179  
1072 Cao J, Packer JS, Ramani V, Cusanovich DA, Huynh C, Daza R, Qiu X, Lee C, Furlan SN, Steemers FJ, Adey A,  
1073 Waterston RH, Trapnell C, Shendure J. 2017. Comprehensive single-cell transcriptional profiling of a  
1074 multicellular organism. *Science* **357**:661-667. doi: 10.1126/science.aam8940, PMID: 28818938  
1075 Chang-Panesso M, Humphreys BD. 2017. Cellular plasticity in kidney injury and repair. *Nature reviews.*  
1076 *Nephrology* **13**:39-46. doi: 10.1038/nrneph.2016.169, PMID: 27890924  
1077 Chen L, Lee JW, Chou CL, Nair AV, Battistone MA, Păunescu TG, Merkulova M, Breton S, Verlander JW, Wall  
1078 SM, Brown D, Burg MB, Knepper MA. 2017. Transcriptomes of major renal collecting duct cell types in  
1079 mouse identified by single-cell RNA-seq. *Proceedings of the National Academy of Sciences of the United*  
1080 *States of America* **114**:E9989-E9998. doi: 10.1073/pnas.1710964114, PMID: 29089413  
1081 Christiansen HE, Schwarze U, Pyott SM, AlSwaid A, Al Balwi M, Alrasheed S, Pepin MG, Weis MA, Eyre DR,  
1082 Byers PH. 2010. Homozygosity for a missense mutation in SERPINH1, which encodes the collagen  
1083 chaperone protein HSP47, results in severe recessive osteogenesis imperfecta. *American journal of human*  
1084 *genetics* **86**:389-398. doi: 10.1016/j.ajhg.2010.01.034, PMID: 20188343  
1085 Croft AP, Campos J, Jansen K, Turner JD, Marshall J, Attar M, Savary L, Wehmeyer C, Naylor AJ, Kemble S,  
1086 Begum J, Dürholz K, Perlman H, Barone F, McGettrick HM, Fearon DT, Wei K, Raychaudhuri S,  
1087 Korsunsky I, Brenner MB, Coles M, Sansom SN, Filer A, Buckley CD. 2019. Distinct fibroblast subsets

- 1088 drive inflammation and damage in arthritis. *Nature* **570**:246-251. doi: 10.1038/s41586-019-1263-7, PMID:  
1089 31142839
- 1090 Farbehi N, Patrick R, Dorison A, Xaymardan M, Janbandhu V, Wystub-Lis K, Ho JW, Nordon RE, Harvey RP.  
1091 2019. Single-cell expression profiling reveals dynamic flux of cardiac stromal, vascular and immune cells  
1092 in health and injury. *eLife* **8**. doi: 10.7554/eLife.43882, PMID: 30912746
- 1093 Forte E, Skelly DA, Chen M, Daigle S, Morelli KA, Hon O, Philip VM, Costa MW, Rosenthal NA, Furtado MB.  
1094 2020. Dynamic Interstitial Cell Response during Myocardial Infarction Predicts Resilience to Rupture in  
1095 Genetically Diverse Mice. *Cell reports* **30**:3149-3163.e6. doi: 10.1016/j.celrep.2020.02.008, PMID:  
1096 32130914
- 1097 Frangogiannis NG. 2021. Cardiac fibrosis. *Cardiovascular research* **117**:1450-1488. doi: 10.1093/cvr/cvaa324,  
1098 PMID: 33135058
- 1099 García R, Merino D, Gómez JM, Nistal JF, Hurlé MA, Cortajarena AL, Villar AV. 2016. Extracellular heat shock  
1100 protein 90 binding to TGF $\beta$  receptor I participates in TGF $\beta$ -mediated collagen production in myocardial  
1101 fibroblasts. *Cellular signalling* **28**:1563-1579. doi: 10.1016/j.cellsig.2016.07.003, PMID: 27418101
- 1102 Gładka MM, Molenaar B, de Ruiter H, van der Elst S, Tsui H, Versteeg D, Lacraz G, Huibers M, van Oudenaarden  
1103 A, van Rooij E. 2018. Single-Cell Sequencing of the Healthy and Diseased Heart Reveals  
1104 Cytoskeleton-Associated Protein 4 as a New Modulator of Fibroblasts Activation. *Circulation* **138**:166-180.  
1105 doi: 10.1161/CIRCULATIONAHA.117.030742, PMID: 29386203
- 1106 Glebova NO, Ginty DD. 2004. Heterogeneous requirement of NGF for sympathetic target innervation in vivo. *The*  
1107 *Journal of neuroscience: the official journal of the Society for Neuroscience* **24**:743-751. doi:  
1108 10.1523/JNEUROSCI.4523-03.2004, PMID: 14736860
- 1109 Gouveia L, Betsholtz C, Andrae J. 2018. PDGF-A signaling is required for secondary alveolar septation and  
1110 controls epithelial proliferation in the developing lung. *Development* **145**. doi: 10.1242/dev.161976, PMID:  
1111 29636361
- 1112 Grindberg RV, Yee-Greenbaum JL, McConnell MJ, Novotny M, Shaughnessy AL, Lambert GM,  
1113 Araúzo-Bravo MJ, Lee J, Fishman M, Robbins GE, Lin X, Venepally P, Badger JH, Galbraith DW, Gage  
1114 FH, Lasken RS. 2013. RNA-sequencing from single nuclei. *Proceedings of the National Academy of*  
1115 *Sciences of the United States of America* **110**:19802-19807. doi: 10.1073/pnas.1319700110, PMID:  
1116 24248345
- 1117 Hänzelmann S, Castelo R, Guinney J. 2013. GSVA: gene set variation analysis for microarray and RNA-seq data.  
1118 *BMC bioinformatics* **14**:7. doi: 10.1186/1471-2105-14-7, PMID: 23323831
- 1119 Huynh-Thu VA, Irrthum A, Wehenkel L, Geurts P. 2010. Inferring regulatory networks from expression data using  
1120 tree-based methods. *PloS one* **5**. doi: 10.1371/journal.pone.0012776, PMID: 20927193
- 1121 Ivey MJ, Kuwabara JT, Riggsbee KL, Tallquist MD. 2019. Platelet-derived growth factor receptor- $\alpha$  is essential for  
1122 cardiac fibroblast survival. *American journal of physiology. Heart and circulatory physiology*  
1123 **317**:H330-H344. doi: 10.1152/ajpheart.00054.2019, PMID: 31125253
- 1124 Jia G, Whaley-Connell A, Sowers JR. 2018. Diabetic cardiomyopathy: a hyperglycaemia-and  
1125 insulin-resistance-induced heart disease. *Diabetologia* **61**:21-28. doi: 10.1007/s00125-017-4390-4, PMID:  
1126 28776083
- 1127 Jiang DS, Liu Y, Zhou H, Zhang Y, Zhang XD, Zhang XF, Chen K, Gao L, Peng J, Gong H, Chen Y, Yang Q, Liu  
1128 PP, Fan GC, Zou Y, Li H. 2014. Interferon regulatory factor 7 functions as a novel negative regulator of  
1129 pathological cardiac hypertrophy. *Hypertension* **63**:713-722. doi:  
1130 10.1161/HYPERTENSIONAHA.113.02653, PMID: 24396025
- 1131 Kalucka J, de Rooij L, Gouveia J, Rohlenova K, Dumas SJ, Meta E, Conchinha NV, Taverna F, Teuwen LA, Veys K,

- 1132 García-Caballero M, Khan S, Geldhof V, Sokol L, Chen R, Treps L, Borri M, de Zeeuw P, Dubois C,  
1133 Karakach TK, Falkenberg KD, Parys M, Yin X, Vinckier S, Du Y, Fenton RA, Schoonjans L, Dewerchin M,  
1134 Eelen G, Thienpont B, Lin L, Bolund L, Li X, Luo Y, Carmeliet P. 2020. Single-Cell Transcriptome Atlas  
1135 of Murine Endothelial Cells. *Cell* **180**:764-779.e20. doi: 10.1016/j.cell.2020.01.015, PMID: 32059779
- 1136 Karaïskos N, Wahle P, Alles J, Boltengagen A, Ayoub S, Kipar C, Kocks C, Rajewsky N, Zinzen RP. 2017. The  
1137 *Drosophila* embryo at single-cell transcriptome resolution. *Science* **358**:194-199. doi:  
1138 10.1126/science.aan3235, PMID: 28860209
- 1139 Kong P, Christia P, Frangogiannis NG. 2014. The pathogenesis of cardiac fibrosis. *Cellular and molecular life*  
1140 *sciences : CMLS* **71**:549-574. doi: 10.1007/s00018-013-1349-6, PMID: 23649149
- 1141 Lake BB, Chen S, Hoshi M, Plongthongkum N, Salamon D, Knoten A, Vijayan A, Venkatesh R, Kim EH, Gao D,  
1142 Gaut J, Zhang K, Jain S. 2019. A single-nucleus RNA-sequencing pipeline to decipher the molecular  
1143 anatomy and pathophysiology of human kidneys. *Nature communications* **10**:2832. doi:  
1144 10.1038/s41467-019-10861-2, PMID: 31249312
- 1145 Lang H, Xiang Y, Ai Z, You Z, Jin X, Wan Y, Yang Y. 2018. UCP3 Ablation Exacerbates High-Salt Induced  
1146 Cardiac Hypertrophy and Cardiac Dysfunction. *Cellular physiology and biochemistry : international*  
1147 *journal of experimental cellular physiology, biochemistry, and pharmacology* **46**:1683-1692. doi:  
1148 10.1159/000489244, PMID: 29694982
- 1149 Li F, Yan K, Wu L, Zheng Z, Du Y, Liu Z, Zhao L, Li W, Sheng Y, Ren L, Tang C, Zhu L. 2021. Single-cell  
1150 RNA-seq reveals cellular heterogeneity of mouse carotid artery under disturbed flow. *Cell death discovery*  
1151 **7**:180. doi: 10.1038/s41420-021-00567-0, PMID: 34282126
- 1152 Li H, Li Y, Xiang L, Zhang J, Zhu B, Xiang L, Dong J, Liu M, Xiang G. 2017. GDF11 Attenuates Development of  
1153 Type 2 Diabetes via Improvement of Islet  $\beta$ -Cell Function and Survival. *Diabetes* **66**:1914-1927. doi:  
1154 10.2337/db17-0086, PMID: 28450417
- 1155 Litviňuková M, Talavera-López C, Maatz H, Reichart D, Worth CL, Lindberg EL, Kanda M, Polanski K, Heinig  
1156 M, Lee M, Nadelmann ER, Roberts K, Tuck L, Fasouli ES, DeLaughter DM, McDonough B, Wakimoto H,  
1157 Gorham JM, Samari S, Mahbubani KT, Saeb-Parsy K, Patone G, Boyle JJ, Zhang H, Zhang H, Viveiros A,  
1158 Oudit GY, Bayraktar OA, Seidman JG, Seidman CE, Nosedá M, Hubner N, Teichmann SA. 2020. Cells of  
1159 the adult human heart. *Nature* **588**:466-472. doi: 10.1038/s41586-020-2797-4, PMID: 32971526
- 1160 Lu Z, Jia Q, Wang R, Wu X, Wu Y, Huang C, Li Y. 2011. Hypoglycemic activities of A- and B-type procyanidin  
1161 oligomer-rich extracts from different Cinnamon barks. *Phytomedicine: international journal of*  
1162 *phytotherapy and phytopharmacology* **18**:298-302. doi: 10.1016/j.phymed.2010.08.008, PMID: 20851586
- 1163 Macosko EZ, Basu A, Satija R, Nemes J, Shekhar K, Goldman M, Tirosh I, Bialas AR, Kamitaki N, Martersteck  
1164 EM, Trombetta JJ, Weitz DA, Sanes JR, Shalek AK, Regev A, McCarroll SA. 2015. Highly Parallel  
1165 Genome-wide Expression Profiling of Individual Cells Using Nanoliter Droplets. *Cell* **161**:1202-1214. doi:  
1166 10.1016/j.cell.2015.05.002, PMID: 26000488
- 1167 Marín-Juez R, El-Sammak H, Helker C, Kamezaki A, Mullapuli ST, Bibli SI, Foglia MJ, Fleming I, Poss KD,  
1168 Stainier D. 2019. Coronary Revascularization During Heart Regeneration Is Regulated by Epicardial and  
1169 Endocardial Cues and Forms a Scaffold for Cardiomyocyte Repopulation. *Developmental cell*  
1170 **51**:503-515.e4. doi: 10.1016/j.devcel.2019.10.019, PMID: 31743664
- 1171 Mathys H, Davila-Velderrain J, Peng Z, Gao F, Mohammadi S, Young JZ, Menon M, He L, Abdurrob F, Jiang X,  
1172 Martorell AJ, Ransohoff RM, Hafler BP, Bennett DA, Kellis M, Tsai LH. 2019. Single-cell transcriptomic  
1173 analysis of Alzheimer's disease. *Nature* **570**:332-337. doi: 10.1038/s41586-019-1195-2, PMID:  
1174 31042697
- 1175 McLellan MA, Skelly DA, Dona M, Squiers GT, Farrugia GE, Gaynor TL, Cohen CD, Pandey R, Diep H, Vinh A,

- 1176 Rosenthal NA, Pinto AR. 2020. High-Resolution Transcriptomic Profiling of the Heart During Chronic  
1177 Stress Reveals Cellular Drivers of Cardiac Fibrosis and Hypertrophy. *Circulation* **142**:1448-1463. doi:  
1178 10.1161/CIRCULATIONAHA.119.045115, PMID: 32795101
- 1179 Park CS, Cha H, Kwon EJ, Jeong D, Hajjar RJ, Kranias EG, Cho C, Park WJ, Kim DH. 2012. AAV-mediated  
1180 knock-down of HRC exacerbates transverse aorta constriction-induced heart failure. *PLoS one* **7**:e43282.  
1181 doi: 10.1371/journal.pone.0043282, PMID: 22952658
- 1182 Park CS, Chen S, Lee H, Cha H, Oh JG, Hong S, Han P, Ginsburg KS, Jin S, Park I, Singh VP, Wang HS,  
1183 Franzini-Armstrong C, Park WJ, Bers DM, Kranias EG, Cho C, Kim DH. 2013. Targeted ablation of the  
1184 histidine-rich Ca(2+)-binding protein (HRC) gene is associated with abnormal SR Ca(2+)-cycling and  
1185 severe pathology under pressure-overload stress. *Basic research in cardiology* **108**:344. doi:  
1186 10.1007/s00395-013-0344-2, PMID: 23553082
- 1187 Peet C, Ivetic A, Bromage DI, Shah AM. 2020. Cardiac monocytes and macrophages after myocardial infarction.  
1188 *Cardiovascular research* **116**:1101-1112. doi: 10.1093/cvr/cvz336, PMID: 31841135
- 1189 Peng J, Sun BF, Chen CY, Zhou JY, Chen YS, Chen H, Liu L, Huang D, Jiang J, Cui GS, Yang Y, Wang W, Guo D,  
1190 Dai M, Guo J, Zhang T, Liao Q, Liu Y, Zhao YL, Han DL, Zhao Y, Yang YG, Wu W. 2019. Single-cell  
1191 RNA-seq highlights intra-tumoral heterogeneity and malignant progression in pancreatic ductal  
1192 adenocarcinoma. *Cell research* **29**:725-738. doi: 10.1038/s41422-019-0195-y, PMID: 31273297
- 1193 Peng K, Tian X, Qian Y, Skibba M, Zou C, Liu Z, Wang J, Xu Z, Li X, Liang G. 2016. Novel EGFR inhibitors  
1194 attenuate cardiac hypertrophy induced by angiotensin II. *Journal of cellular and molecular medicine*  
1195 **20**:482-494. doi: 10.1111/jcmm.12763, PMID: 26762600
- 1196 Ramiłowski JA, Goldberg T, Harshbarger J, Kloppmann E, Lizio M, Satagopam VP, Itoh M, Kawaji H, Carninci P,  
1197 Rost B, Forrest AR. 2015. A draft network of ligand-receptor-mediated multicellular signalling in human.  
1198 *Nature communications* **6**:7866. doi: 10.1038/ncomms8866, PMID: 26198319
- 1199 Rottlaender D, Reda S, Motloch LJ, Hoppe UC. 2011. [New tyrosine kinase and EGFR inhibitors in cancer therapy.  
1200 Cardiac and skin toxicity as relevant side effects. Part A: heart]. *Der Internist* **52**:1245-1255. doi:  
1201 10.1007/s00108-011-2895-3, PMID: 21792599
- 1202 Rozenblatt-Rosen O, Stubbington M, Regev A, Teichmann SA. 2017. The Human Cell Atlas: from vision to reality.  
1203 *Nature* **550**:451-453. doi: 10.1038/550451a, PMID: 29072289
- 1204 Rudat C, Norden J, Taketo MM, Kispert A. 2013. Epicardial function of canonical Wnt-, Hedgehog-, Fgfr1/2-, and  
1205 Pdgfra-signalling. *Cardiovascular research* **100**:411-421. doi: 10.1093/cvr/cvt210, PMID: 24000064
- 1206 Russo I, Frangogiannis NG. 2016. Diabetes-associated cardiac fibrosis: Cellular effectors, molecular mechanisms  
1207 and therapeutic opportunities. *Journal of molecular and cellular cardiology* **90**:84-93. doi:  
1208 10.1016/j.yjmcc.2015.12.011, PMID: 26705059
- 1209 Schipke J, Brandenberger C, Rajces A, Manninger M, Alogna A, Post H, Mühlfeld C. 2017. Assessment of cardiac  
1210 fibrosis: a morphometric method comparison for collagen quantification. *Journal of applied physiology*  
1211 (*Bethesda, Md. : 1985*) **122**:1019-1030. doi: 10.1152/jappphysiol.00987.2016, PMID: 28126909
- 1212 Senatus L, López-Díez R, Egaña-Gorroño L, Liu J, Hu J, Daffu G, Li Q, Rahman K, Vengrenyuk Y, Barrett TJ,  
1213 Dewan MZ, Guo L, Fuller D, Finn AV, Virmani R, Li H, Friedman RA, Fisher EA, Ramasamy R, Schmidt  
1214 AM. 2020. RAGE impairs murine diabetic atherosclerosis regression and implicates IRF7 in macrophage  
1215 inflammation and cholesterol metabolism. *JCI insight* **5**. doi: 10.1172/jci.insight.137289, PMID: 32641587
- 1216 Sheeran FL, Angerosa J, Liaw NY, Cheung MM, Pepe S. 2019. Adaptations in Protein Expression and Regulated  
1217 Activity of Pyruvate Dehydrogenase Multienzyme Complex in Human Systolic Heart Failure. *Oxidative*  
1218 *medicine and cellular longevity* **2019**:4532592. doi: 10.1155/2019/4532592, PMID: 30881593
- 1219 Shinagawa H, Frantz S. 2015. Cellular immunity and cardiac remodeling after myocardial infarction: role of

- 1220 neutrophils, monocytes, and macrophages. *Current heart failure reports* **12**:247-254. doi:  
1221 10.1007/s11897-015-0255-7, PMID: 25721354
- 1222 Skelly DA, Squiers GT, McLellan MA, Bolisetty MT, Robson P, Rosenthal NA, Pinto AR. 2018. Single-Cell  
1223 Transcriptional Profiling Reveals Cellular Diversity and Intercommunication in the Mouse Heart. *Cell*  
1224 *reports* **22**:600-610. doi: 10.1016/j.celrep.2017.12.072, PMID: 29346760
- 1225 Soliman H, Paylor B, Scott RW, Lemos DR, Chang C, Arostegui M, Low M, Lee C, Fiore D, Braghetta P,  
1226 Pospichalova V, Barkauskas CE, Korinek V, Rampazzo A, MacLeod K, Underhill TM, Rossi F. 2020.  
1227 Pathogenic Potential of Hic1-Expressing Cardiac Stromal Progenitors. *Cell stem cell* **26**:205-220.e8. doi:  
1228 10.1016/j.stem.2019.12.008, PMID: 31978365
- 1229 Speicher T, Siegenthaler B, Bogorad RL, Ruppert R, Petzold T, Padrisa-Altes S, Bachofner M, Anderson DG,  
1230 Kotliansky V, Fässler R, Werner S. 2014. Knockdown and knockout of  $\beta$ 1-integrin in hepatocytes impairs  
1231 liver regeneration through inhibition of growth factor signalling. *Nature communications* **5**:3862. doi:  
1232 10.1038/ncomms4862, PMID: 24844558
- 1233 Stubbington M, Rozenblatt-Rosen O, Regev A, Teichmann SA. 2017. Single-cell transcriptomics to explore the  
1234 immune system in health and disease. *Science* **358**:58-63. doi: 10.1126/science.aan6828, PMID: 28983043
- 1235 Travers JG, Kamal FA, Robbins J, Yutzey KE, Blaxall BC. 2016. Cardiac Fibrosis: The Fibroblast Awakens.  
1236 *Circulation research* **118**:1021-1040. doi: 10.1161/CIRCRESAHA.115.306565, PMID: 26987915
- 1237 Wang Y, Li C, Shi L, Chen X, Cui C, Huang J, Chen B, Hall DD, Pan Z, Lu M, Hong J, Song LS, Zhao S. 2020.  
1238 Integrin  $\beta$ 1D Deficiency-Mediated RyR2 Dysfunction Contributes to Catecholamine-Sensitive Ventricular  
1239 Tachycardia in Arrhythmogenic Right Ventricular Cardiomyopathy. *Circulation* **141**:1477-1493. doi:  
1240 10.1161/CIRCULATIONAHA.119.043504, PMID: 32122157
- 1241 Wu RN, Yu TY, Zhou JC, Li M, Gao HK, Zhao C, Dong RQ, Peng D, Hu ZW, Zhang XW, Wu YQ. 2018.  
1242 Targeting HMGB1 ameliorates cardiac fibrosis through restoring TLR2-mediated autophagy suppression in  
1243 myocardial fibroblasts. *International journal of cardiology* **267**:156-162. doi: 10.1016/j.ijcard.2018.04.103,  
1244 PMID: 29957254
- 1245 Yoshioka J, Imahashi K, Gabel SA, Chutkow WA, Burds AA, Gannon J, Schulze PC, MacGillivray C, London RE,  
1246 Murphy E, Lee RT. 2007. Targeted deletion of thioredoxin-interacting protein regulates cardiac dysfunction  
1247 in response to pressure overload. *Circulation research* **101**:1328-1338. doi:  
1248 10.1161/CIRCRESAHA.106.160515, PMID: 17916779
- 1249 Yu W, Zha W, Guo S, Cheng H, Wu J, Liu C. 2014. Flos Puerariae extract prevents myocardial apoptosis via  
1250 attenuation oxidative stress in streptozotocin-induced diabetic mice. *PloS one* **9**:e98044. doi:  
1251 10.1371/journal.pone.0098044, PMID: 24865768
